# Supplementary material for: Synthesis and evaluation of new chiral nonracemic C2-symmetric and unsymmetric 2,2′-bipyridyl ligands
Source: Royal Society of Chemistry journal article supplement (doi:10.1039/b513286j), 2006-01-01
Supplement: b513286j.pdf [file b513286j.pdf]

## Electronic Supplementary Information

### *Synthesis and Evaluation of New Chiral Nonracemic C<sub>2</sub>-Symmetric and Unsymmetric 2,2'-Bipyridyl Ligands*

Michael P. A. Lyle,<sup>†</sup> Neil D. Draper<sup>‡</sup> and Peter D. Wilson\*

*Department of Chemistry, Simon Fraser University, 8888 University Drive,  
Burnaby, British Columbia V5A 1S6, Canada*

### Table of Contents

|                                                                                                                                                                         |                  |
|-------------------------------------------------------------------------------------------------------------------------------------------------------------------------|------------------|
| <b>1. General Experimental Details .....</b>                                                                                                                            | <b>S2 - S3</b>   |
| <b>2. Experimental Procedures and Product Characterization Data ..</b>                                                                                                  | <b>S3 - S6</b>   |
| <b>3. Preparation, Product Characterization and X-Ray Crystallo-<br/>graphic Data of the <i>bis</i>-2,2'-Bipyridyl Ligand Copper(I) Chloride<br/>Complex (18) .....</b> | <b>S6 - S20</b>  |
| <b>4. <sup>1</sup>H and <sup>13</sup>C NMR Spectra .....</b>                                                                                                            | <b>S21 - S44</b> |

---

<sup>†</sup> M.P.A.L. performed all of the synthetic work and obtained all of the compound characterization data described herein.

<sup>‡</sup> N.D.D. determined the X-ray crystal structure of the *bis*-2,2'-bipyridyl ligand copper(I) chloride complex **18**.

## 1. General Experimental Details

All non-aqueous reactions were performed under an atmosphere of dry nitrogen in oven- or flame-dried glassware, unless indicated otherwise. The reaction temperatures stated were those of the external bath. Diethyl ether (ether) and tetrahydrofuran (THF) were dried over sodium/benzophenone ketyl and distilled under an atmosphere of dry nitrogen immediately prior to use. Benzene and dichloromethane were dried over calcium hydride and distilled under an atmosphere of dry nitrogen immediately prior to use. All other solvents and reagents were purified by standard techniques or used as supplied.<sup>1</sup> Brine refers to a saturated aqueous solution of sodium chloride. Silica gel column chromatography (“flash chromatography”) was carried out using *Merck silica gel 60* (230 to 400 mesh).<sup>2</sup> Melting points were measured on a *Gallenkamp* capillary melting point apparatus and are uncorrected. Optical rotations were recorded on a *Perkin Elmer 341* polarimeter. All proton and carbon nuclear magnetic resonance spectra (<sup>1</sup>H and <sup>13</sup>C NMR, respectively) were recorded using a *Bruker AMX 400 FT* spectrometer (operating frequencies: <sup>1</sup>H, 400.13 MHz; <sup>13</sup>C, 100.61 MHz) at ambient temperature. Chemical shifts ( $\delta$ ) for all compounds are listed in parts per million downfield from tetramethylsilane using the NMR solvent as an internal reference. The reference values used for deuterated chloroform (CDCl<sub>3</sub>) were 7.26 and 77.16 ppm for <sup>1</sup>H and <sup>13</sup>C NMR spectra, respectively. Infrared spectra (IR) were recorded as either KBr pellets (KBr) or as films (neat) using a *Perkin Elmer 599B* IR spectrophotometer. Low-resolution mass spectra (MS) were recorded on a *Hewlett Packard 5985* GC-mass spectrometer. The mode of ionization used was chemical ionization (CI) with isobutane. Analytical chiral high performance liquid chromatography (HPLC) was performed on a *Hewlett Packard Series 1050* instrument. The optical rotary dispersion spectrum of the bis-2,2'-bipyridyl ligand copper(I) chloride complex **18** was recorded on a *Jasco J-810* spectropolarimeter. The UV-visible spectrum of this complex was recorded on a *Varian Cary 300 UV-VIS* spectrophotometer.

---

(1) W. L. F. Armarego and D. D. Perrin, *Purification of Laboratory Chemicals*, 4<sup>th</sup> ed., Butterworth-Heinemann, Oxford, 1997.

(2) W. C. Still, M. Kahn and A. Mitra, *J. Org. Chem.*, 1978, **43**, 2923.

## 2. Experimental Procedures and Characterization Data

Preparation of 4,4'-dimethyl-6,6',7,7'-tetrahydro-5*H*,5'*H*-2,2'-bi([1]pyrindinyl)-7,7'-dione (2*R*,3*R*)-2,3-butanediol *bis*-acetal (**1a**) and 4-methyl-6,7-dihydro-5*H*-[1]pyrindin-7-one (2*R*,3*R*)-2,3-butanediol acetal (**10**) from the 2-chloropyridine acetal (**3a**).

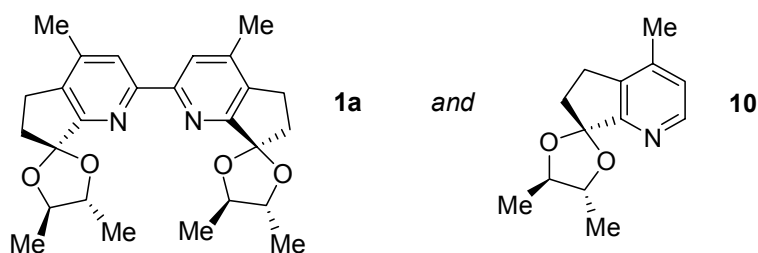

To a stirred solution of dibromobis(triphenylphosphine)nickel(II) (1.17 g, 1.58 mmol) in degassed tetrahydrofuran (30 mL) were added zinc dust (<10 microns, 310 mg, 4.74 mmol) and tetraethylammonium iodide (812 mg, 3.16 mmol). The reaction mixture was stirred at room temperature for 30 min and then a solution of the 2-chloropyridine acetal **3a**<sup>3</sup> (800 mg, 3.16 mmol) in degassed tetrahydrofuran (12 mL) was added *via* a cannula. The resultant mixture was heated at 60 °C for 72 h and then allowed to cool to room temperature. The reaction mixture was poured into an aqueous solution of ammonium hydroxide (10% w/w, 200 mL) and was extracted with a mixture of ether and benzene (1:1, 3 x 100 mL). The combined organic extracts were washed with water (2 x 20 mL), dried over anhydrous sodium sulfate and concentrated *in vacuo* to afford the crude product. Flash chromatography using chloroform as the eluant afforded the *title compound* **10** (242 mg, 35%) as a white crystalline solid and the *title compound* **1a** (269 mg, 39%) as a white crystalline solid. *Title compound 1a*: **M.p.** 292-294 °C, chloroform;  $[\alpha]_D^{20}$  –53.7 (*c* 0.99, chloroform); <sup>1</sup>H NMR (CDCl<sub>3</sub>) δ 1.35 (6H, d, *J* = 6.1 Hz, CHCH<sub>3</sub>), 1.57 (6H, d, *J* = 6.0 Hz, CHCH<sub>3</sub>), 2.33 (6H, s, ArCH<sub>3</sub>), 2.41-2.49 (4H, m, ArCH<sub>2</sub>CH<sub>2</sub>), 2.83-2.89 (4H, m, ArCH<sub>2</sub>), 3.84 (2H, dq, *J* = 6.0, 8.0 Hz, CHCH<sub>3</sub>), 4.55 (2H, dq, *J* = 6.0, 7.8 Hz, CHCH<sub>3</sub>), 8.21 (2H, s, ArH); <sup>13</sup>C NMR (CDCl<sub>3</sub>) δ 16.8, 17.6, 18.6, 24.3, 36.1, 79.0, 79.6, 114.4, 122.1, 135.5,

(3) For full experimental details regarding the preparation of the 2-chloropyridine acetals **3a-c**, see: (a) M. P. A. Lyle and P. D. Wilson, *Org. Lett.*, 2004, **6**, 855; (b) M. P. A. Lyle, A. A. Narine and P. D. Wilson, *J. Org. Chem.*, 2004, **69**, 5060.

144.5, 156.5, 160.8; **IR** (KBr)  $\nu_{\max}$  2982, 2970, 2935, 2896, 1591, 1432, 1423, 1379, 1321, 1293, 1204, 1181, 1162, 1095, 1076, 1059  $\text{cm}^{-1}$ ; **MS** (CI)  $m/z$  (rel. intensity) 437 (M + H, 100), 365 (45), 167 (48); **Anal.** Calcd. for  $\text{C}_{26}\text{H}_{32}\text{N}_2\text{O}_4$ : C, 71.53; H, 7.39; N, 6.42. Found: C, 71.38; H, 7.22; N, 6.26. *Title compound 10*: **M.p.** 52-54 °C, chloroform;  $[\alpha]_D^{20}$  - 14.9 ( $c$  1.02, chloroform);  **$^1\text{H}$  NMR** ( $\text{CDCl}_3$ )  $\delta$  1.33 (3H, d,  $J$  = 6.1 Hz,  $\text{CHCH}_3$ ), 1.41 (3H, d,  $J$  = 6.0 Hz  $\text{CHCH}_3$ ), 2.25 (3H, s,  $\text{ArCH}_3$ ), 2.33-2.42 (2H, m,  $\text{ArCH}_2\text{CH}_2$ ), 2.79-2.86 (2H, m,  $\text{ArCH}_2$ ), 3.78 (1H, dq,  $J$  = 6.1, 7.8 Hz,  $\text{CHCH}_3$ ), 4.32 (1H, dq,  $J$  = 6.1, 8.0 Hz,  $\text{CHCH}_3$ ), 6.99 (1H, d,  $J$  = 4.8 Hz,  $\text{ArH}$ ), 8.40 (1H, d,  $J$  = 4.8 Hz,  $\text{ArH}$ );  **$^{13}\text{C}$  NMR** ( $\text{CDCl}_3$ )  $\delta$  16.7, 16.8, 18.2, 24.3, 36.2, 79.4, 114.1, 124.7, 135.9, 144.4, 149.4, 161.0; **IR** (KBr)  $\nu_{\max}$  2974, 2921, 2862, 1602, 1448, 1378, 1331, 1303, 1193, 1094, 926, 828  $\text{cm}^{-1}$ ; **MS** (CI)  $m/z$  (rel. intensity) 220 (M + H, 100); **Anal.** Calcd. for  $\text{C}_{13}\text{H}_{17}\text{NO}_2$ : C, 71.21; H, 7.81; N, 6.39. Found: C, 71.07; H, 7.84; N, 6.32.

**Preparation of 4,4'-dimethyl-6,6',7,7'-tetrahydro-5H,5'H-2,2'-bi([1]pyrindinyl)-7,7'-dione (1S,2S)-1,2-diisopropyl-1,2-ethanediol bis-acetal (1b) from the 2-chloropyridine acetal (3b).**

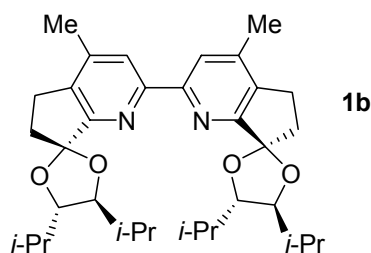

To a stirred solution of dibromobis(triphenylphosphine)nickel(II) (609 mg, 0.82 mmol) in degassed tetrahydrofuran (12 mL) were added zinc dust (<10 microns, 162 mg, 2.48 mmol) and tetraethylammonium iodide (424 mg, 1.65 mmol). The reaction mixture was stirred at room temperature for 30 min and then a solution of the 2-chloropyridine acetal **3b**<sup>3</sup> (511 mg, 1.65 mmol) in degassed tetrahydrofuran (6 mL) was added *via* a cannula. The resultant mixture was heated at 60 °C for 72 h and then was allowed to cool to room temperature. The reaction mixture was poured into an aqueous solution of ammonium hydroxide (10% w/w, 200 mL) and was extracted with ether (3 x 50 mL). The combined organic extracts were washed with water (2 x 20 mL), dried over anhydrous sodium sulfate and concentrated *in vacuo* to afford the crude product. Flash chromatography using hexanes:ether (10:1) as the eluant afforded the *title*

*compound 1b* (326 mg, 72%) as a white crystalline solid. **M.p.** 166-167 °C, hexanes/ether;  $[\alpha]_D^{20}$  –44.3 (*c* 0.37, chloroform);  $^1\text{H NMR}$  ( $\text{CDCl}_3$ )  $\delta$  0.99-1.08 (24H, m,  $\text{CHCH}_3$ ), 1.82-1.95 (2H, m,  $\text{CHCH}_3$ ), 2.31 (6H, s,  $\text{ArCH}_3$ ), 2.39-2.45 (4H, m,  $\text{ArCH}_2\text{CH}_2$ ), 2.46-2.58 (2H, m,  $\text{CHCH}_3$ ), 2.81-2.87 (4H, m,  $\text{ArCH}_2$ ), 3.72 (2H, dd,  $J = 4.8, 7.8$  Hz,  $\text{OCH}$ ), 4.18 (2H, dd,  $J = 4.8, 6.4$  Hz,  $\text{OCH}$ ), 8.21 (2H, s,  $\text{ArH}$ );  $^{13}\text{C NMR}$  ( $\text{CDCl}_3$ )  $\delta$  17.8, 18.6, 19.0, 19.4, 19.9, 24.2, 31.5, 31.8, 37.1, 85.8, 86.1, 115.5, 122.2, 135.9, 144.4, 156.5, 160.3; **IR** (KBr)  $\nu_{\text{max}}$  2959, 2872, 1596, 1573, 1468, 1435, 1384, 1367, 1324, 1292, 1225, 1191, 1163, 1148, 1099, 1056, 1009, 921  $\text{cm}^{-1}$ ; **MS** (MALDI-TOF)  $m/z$  550 ( $M + H$ ); **Anal.** Calcd. for  $\text{C}_{34}\text{H}_{48}\text{N}_2\text{O}_4$ : C, 74.42; H, 8.82; N, 5.10. Found: C, 74.60; H, 8.95; N, 5.30.

**Preparation of 4-methyl-2-(2'-pyridyl)-6,7-dihydro-5H-[1]pyrindin-7-one (2R,3R)-2,3-butanediol acetal (2a) from the 2-chloropyridine acetal (3a).**

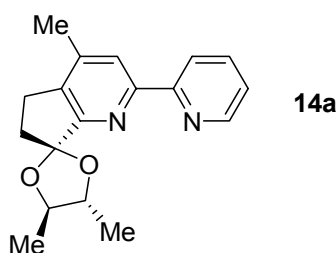

To a stirred solution the 2-chloropyridine acetal **3a**<sup>3</sup> (175 mg, 0.690 mmol) and 2-(tri-*n*-butylstannyl)pyridine<sup>4</sup> (472 mg, 0.759 mmol) in anhydrous, degassed dioxane (3 mL) at room temperature were added *tris*(dibenzylideneacetone)dipalladium(0) (16 mg, 17  $\mu\text{mol}$ ), a solution of tri-*t*-butylphosphine in tetrahydrofuran (0.10 M, 0.69 mL, 69  $\mu\text{mol}$ ) and anhydrous cesium fluoride (231 mg, 1.52 mmol). The resultant solution was heated at reflux for 24 h and then was allowed to cool to room temperature. The reaction mixture was filtered through a pad of silica gel using ethyl acetate as the eluant and the filtrate was then concentrated *in vacuo* to afford the crude product. Flash chromatography using hexanes:ether (4:1) as the eluant afforded the *title compound 2a* (147 mg, 72%) as a white crystalline solid. **M.p.** 164-165 °C, hexanes/ether;  $[\alpha]_D^{20}$  –40.8 (*c* 1.04, chloroform);  $^1\text{H NMR}$  ( $\text{CDCl}_3$ )  $\delta$  1.37 (3H, d,  $J = 6.1$  Hz,  $\text{CHCH}_3$ ), 1.52 (3H, d,  $J$

(4) 2-(Tri-*n*-butylstannyl)pyridine was prepared from 2-bromopyridine according to a literature procedure, see: W. R. McWhinnie, R. C. Poller and M. Thevarasa, *J. Organomet. Chem.*, 1968, **11**, 499.

= 6.0 Hz, CHCH<sub>3</sub>), 2.34 (3H, s, ArCH<sub>3</sub>), 2.44-2.50 (2H, m, ArCH<sub>2</sub>CH<sub>2</sub>), 2.85-2.91 (2H, m, ArCH<sub>2</sub>), 3.80-3.89 (1H, m, CHCH<sub>3</sub>), 4.54-4.62 (1H, m, CHCH<sub>3</sub>), 7.25-7.29 (1H, m, ArH), 7.76-7.84 (1H, m, ArH), 8.20 (1H, s, ArH), 8.45-8.49 (1H, m, ArH), 8.63-8.67 (1H, m, ArH); <sup>13</sup>C NMR (CDCl<sub>3</sub>) δ 16.7, 17.6, 18.4, 24.3, 36.0, 79.1, 79.7, 114.3, 121.3, 122.0, 123.5, 136.0, 136.9, 145.1, 148.9, 155.8, 156.7, 161.3; IR (KBr) ν<sub>max</sub> 1586, 1565, 1441, 1376, 1316, 1191, 1096, 1079, 932, 896, 798 cm<sup>-1</sup>; MS (CI) m/z (rel. intensity) 297 (M + H, 100); Anal. Calcd. for C<sub>18</sub>H<sub>20</sub>N<sub>2</sub>O<sub>2</sub>: C, 72.95; H, 6.80; N, 9.45. Found: C, 72.68; H, 7.00; N, 9.17.

### 3. Preparation, Product Characterization and X-Ray Crystallographic Data of the *bis*-2,2'-Bipyridyl Ligand Copper(I) Chloride Complex (**18**)

Procedure for the preparation and crystallization of *bis*-[4,4'-dimethyl-6,6',7,7'-tetrahydro-5*H*,5'*H*-2,2'-bi([1]pyrindinyl)-7,7'-dione (1*S*,2*S*)-1,2-diphenyl-1,2-ethanediol *bis*-acetal] copper(I) chloride complex (**18**).

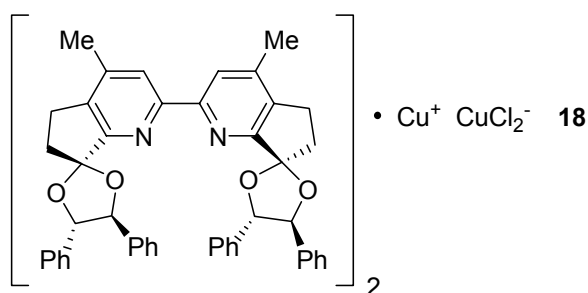

A solution of the bipyridyl ligand **1c** (35 mg, 51 μmol) and anhydrous copper(I) chloride (5.0 mg, 51 μmol) in a mixture of ethanol:dichloromethane (1:1, 3 mL) was stirred at room temperature for 4 h. The reaction mixture was then concentrated *in vacuo* to afford the crude product. This material was taken up in dichloromethane (2 mL) and was filtered through a plug of glass wool. Ether (3 mL) was then added to the filtrate and, upon slow evaporation of the solvent, the *title compound* **18** (27 mg, 68%) was obtained as bright red crystals that were suitable for X-ray crystallography. **M.p.** >220 °C (dec.), ether/dichloromethane; [α]<sub>253</sub><sup>20</sup> - 2500, [α]<sub>365</sub><sup>20</sup> - 4900, [α]<sub>405</sub><sup>20</sup> - 3400, [α]<sub>546</sub><sup>20</sup> - 1300, [α]<sub>589</sub><sup>20</sup> - 1300 (*c* 0.0030, chloroform); UV-vis λ<sub>max</sub>

(chloroform) 287 ( $\epsilon = 3.8 \times 10^4 \text{ M}^{-1} \text{ cm}^{-1}$ ), 309 ( $\epsilon = 3.9 \times 10^4 \text{ M}^{-1} \text{ cm}^{-1}$ ), 472 ( $\epsilon = 6.2 \times 10^3 \text{ M}^{-1} \text{ cm}^{-1}$ ) nm; );  $^1\text{H NMR}$  ( $\text{CDCl}_3$ )  $\delta$  1.74 (12H, s,  $\text{ArCH}_3$ ), 2.40-2.52 (4H, m,  $\text{ArCH}_2\text{CHH}$ ), 2.59-2.73 (8H, m,  $\text{ArCH}_2\text{CHH}$  and  $\text{ArCHH}$ ), 2.78-2.92 (4H, m,  $\text{ArCHH}$ ), 3.79 (4H, d,  $J = 8.5 \text{ Hz}$ ,  $\text{CHPh}$ ), 4.35 (4H, d,  $J = 8.5 \text{ Hz}$ ,  $\text{CHPh}$ ), 6.51-6.59 (8H, m,  $\text{ArH}$ ), 6.63-6.75 (8H, m,  $\text{ArH}$ ), 6.81-6.92 (12H, m,  $\text{ArH}$ ), 7.22-7.31 (12H, m,  $\text{ArH}$ ), 7.35 (4H, s,  $\text{ArH}$ );  $^{13}\text{C NMR}$  ( $\text{CDCl}_3$ )  $\delta$  19.0, 23.9, 37.3, 85.3, 85.5, 115.7, 123.3, 124.5, 127.7, 128.0, 128.2, 133.9, 137.5, 141.1, 145.8, 151.7; **IR** (KBr)  $\nu_{\text{max}}$  1603, 1496, 1315, 1167, 1140, 1056, 1023, 951, 807, 759  $\text{cm}^{-1}$ ; **MS** (MALDI-TOF)  $m/z$  1431 ( $\text{M} - \text{CuCl}_2$ ), 747 ( $\text{M} - \text{CuCl}_2 - \text{L}$ ); **Anal.** Calcd. for  $\text{C}_{92}\text{H}_{80}\text{Cl}_2\text{Cu}_2\text{N}_4\text{O}_8 \cdot \text{CH}_2\text{Cl}_2$ : C, 67.59; H, 5.00; N, 3.39. Found: C, 68.07; H, 5.06; N, 3.69 (of note, the crystals of complex **18** readily desolvated).

#### **X-ray crystallographic analysis of the *bis*-2,2'-bipyridyl ligand copper(I) chloride complex (**18**).**

A single crystal, a red block that had the dimensions 0.17 x 0.40 x 0.94  $\text{mm}^3$ , was mounted on a glass fibre using epoxy adhesive. The data for this crystal of the *bis*-2,2'-bipyridyl ligand copper(I) chloride complex **18** was acquired at 293 K on a *Rigaku RAXIS-RAPID* curved image plate area detector with graphite monochromated Cu  $K\alpha$  radiation. Indexing for the crystal was performed using four,  $5^\circ$  oscillations that were exposed for 300 seconds. A sweep of data was then collected using  $\omega$  scans from  $0.0^\circ$  to  $180.0^\circ$  in  $10^\circ$  steps, at  $\chi = 0.0^\circ$  and  $\phi = 0.0^\circ$ . A second sweep of data was collected using  $\omega$  scans from  $0.0^\circ$  to  $180.0^\circ$  in  $10^\circ$  steps, at  $\chi = 45.0^\circ$  and  $\phi = 0.0^\circ$ . A final sweep of data was collected using  $\omega$  scans from  $0.0^\circ$  to  $180.0^\circ$  in  $10^\circ$  steps, at  $\chi = 45.0^\circ$  and  $\phi = 90.0^\circ$ . The following data range was recorded:  $4.65^\circ \leq 2\theta \leq 144.25^\circ$  and a total of fifty four images were collected. The exposure rate was 75  $\text{sec}/^\circ$  and in each case, the crystal-to-detector distance was 127.40 mm. A numerical absorption correction was then applied which resulted in the following transmission range: 0.4114 to 0.6854.<sup>5</sup> The coordinates and anisotropic displacement parameters for the non-hydrogen atoms were then refined with the exception of Cl(5), Cl(6) and C(47). These three atoms of half occupancy were refined using isotropic parameters. Of note, hydrogen atoms were placed in calculated positions (d C-H 0.95

---

(5) J. de Meulenaer and H. Tompa, *Acta Cryst.*, 1965, **19**, 1014.

Å) and their coordinate shifts were linked with those of the respective carbon atoms during refinement. Isotropic thermal parameters for the hydrogen atoms were initially assigned proportionately to the equivalent isotropic thermal parameters of their respective carbon atoms. Subsequently, the isotropic thermal parameters for the hydrogen atoms were constrained to have identical shifts during refinement. The programs used for all absorption corrections, data reduction and processing were from the *Rigaku CrystalClear* package. The structure was refined using *CRYSTALS*.<sup>6</sup> Complex scattering factors for neutral atoms were used in the calculation of structure factors.<sup>7</sup> ORTEP representations of the *bis*-2,2'-bipyridyl ligand copper(I) chloride complex **18** are provided below (Figures 3.1 and 3.2). Crystallographic data, fractional atomic coordinates and equivalent isotropic thermal displacement parameters, selected bond lengths as well as selected bond angles for the *bis*-2,2'-bipyridyl ligand copper(I) chloride complex **18** are also listed below (Table 3.1, 3.2, 3.3 and 3.4, respectively).

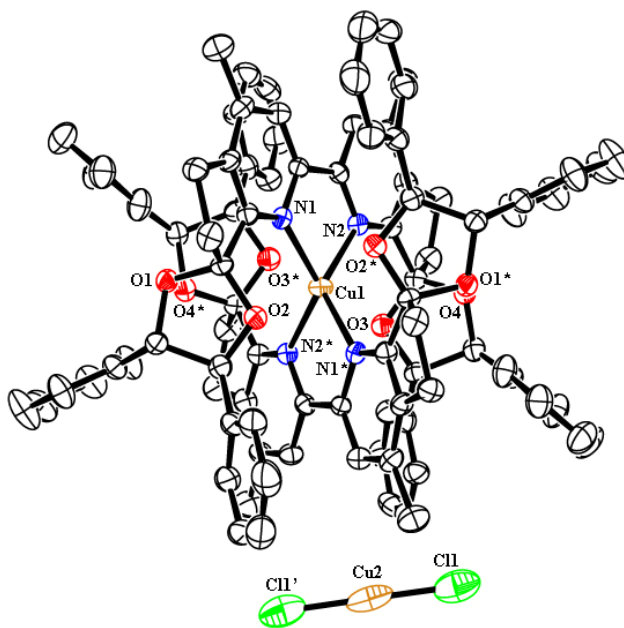

**Figure 3.1.** ORTEP representation of the *bis*-2,2'-bipyridyl ligand copper(I) chloride complex **18**.<sup>8</sup>

(6) D. J. Watkin, C. K. Prout, J. R. Carruthers, P. W. Betteridge and R. I. Cooper, *CRYSTALS* Issue 12.50, Chemical Crystallography Laboratory, University of Oxford, Oxford, England, 2003.

(7) International Union of Crystallography, *International Tables for X-Ray Crystallography*, Kynoch Press, Birmingham, England, 1952.

(8) The thermal ellipsoids are drawn at a 25% probability level and the atoms of the incorporated solvent molecule ( $\text{CH}_2\text{Cl}_2$ ) as well as the hydrogen atoms have been removed for clarity. Symmetry transformations: (\*)  $-x - 2, -y - 1, z$ ; (')  $-x - 3, -y - 1, z$ .



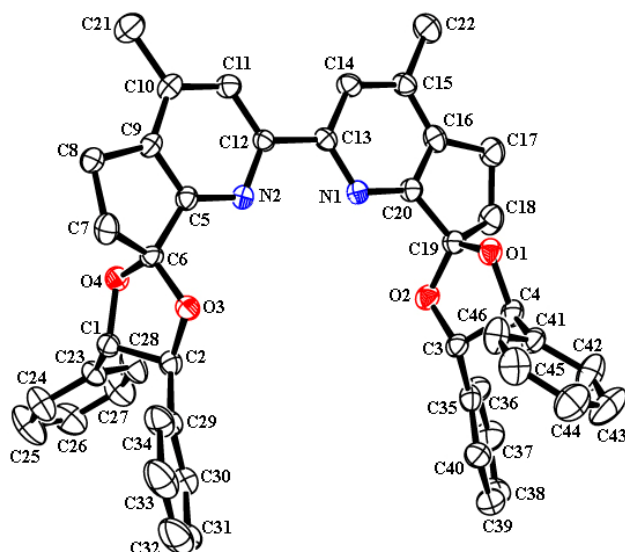

**Figure 3.2.** Partial ORTEP representation of the *bis*-2,2'-bipyridyl ligand copper(I) chloride complex **18** showing the carbon atom numbering scheme of the 2,2'-bipyridyl ligand.<sup>8</sup>

**Table 3.1.** Summary of Crystallographic Data for the *bis*-2,2'-Bipyridyl Ligand Copper(I) Chloride Complex **18**

|                                                |                                                                                               |
|------------------------------------------------|-----------------------------------------------------------------------------------------------|
| Empirical formula                              | C <sub>93</sub> H <sub>82</sub> Cl <sub>4</sub> Cu <sub>2</sub> N <sub>4</sub> O <sub>8</sub> |
| <i>FW</i> (g mol <sup>-1</sup> )               | 1648.35                                                                                       |
| Temperature (K)                                | 293                                                                                           |
| Wavelength (Cu <i>K</i> α, Å)                  | 1.54180                                                                                       |
| Crystal system                                 | Orthorhombic                                                                                  |
| Space group                                    | <i>P</i> 2 <sub>1</sub> 2 <sub>1</sub> 2                                                      |
| <i>a</i> (Å)                                   | 14.7325(4)                                                                                    |
| <i>b</i> (Å)                                   | 15.2366(2)                                                                                    |
| <i>c</i> (Å)                                   | 19.0213(3)                                                                                    |
| $\alpha$ (°)                                   | 90                                                                                            |
| $\beta$ (°)                                    | 90                                                                                            |
| $\gamma$ (°)                                   | 90                                                                                            |
| <i>Z</i>                                       | 2                                                                                             |
| <i>U</i> (Å <sup>3</sup> )                     | 4269.77(15)                                                                                   |
| <i>D</i> <sub>calc</sub> (g cm <sup>-3</sup> ) | 1.285                                                                                         |

|                                             |               |
|---------------------------------------------|---------------|
| $2\theta$ limits (°)                        | 4.65-144.25   |
| Reflections collected                       | 28285         |
| Independent reflections                     | 6828          |
| Reflections observed [ $I = 2.5\sigma(I)$ ] | 4566          |
| Goodness-of-fit on $F$                      | 0.601         |
| $R_1, R_w$ [ $I = 2.5\sigma(I)$ ]           | 0.0532, 0.750 |

**Table 3.2.** Fractional Atomic Coordinates (Å) and Equivalent Isotropic Thermal Displacement Parameters [ $U(\text{iso}), (\text{Å}^2)$ ] for the *bis*-2,2'-Bipyridyl Ligand Copper(I) Chloride Complex **18**<sup>9</sup>

| atom | $x$        | $y$        | $z$          | $U(\text{iso})$ |
|------|------------|------------|--------------|-----------------|
| Cu1  | -1.0000    | -0.5000    | -0.74787(4)  | 0.0504          |
| Cu2  | -1.5000    | -0.5000    | -0.76716(8)  | 0.1386          |
| Cl1  | -1.4990(2) | -0.3648(3) | -0.76428(13) | 0.1615          |
| O1   | -1.0381(3) | -0.7195(2) | -0.86114(17) | 0.0593          |
| O2   | -1.0694(3) | -0.5825(2) | -0.90075(17) | 0.0613          |
| O3   | -1.0397(2) | -0.4058(2) | -0.59490(16) | 0.0543          |
| O4   | -0.9617(2) | -0.2825(2) | -0.62182(17) | 0.0518          |
| N1   | -0.9054(3) | -0.5703(2) | -0.80400(16) | 0.0447          |
| N2   | -0.8869(3) | -0.4603(2) | -0.69351(16) | 0.0436          |
| C1   | -1.0541(4) | -0.2552(3) | -0.6092(2)   | 0.0498          |
| C2   | -1.1043(4) | -0.3416(3) | -0.6187(2)   | 0.0528          |
| C3   | -1.1556(4) | -0.6226(3) | -0.8818(3)   | 0.0522          |
| C4   | -1.1324(4) | -0.7206(3) | -0.8795(2)   | 0.0588          |
| C5   | -0.8787(4) | -0.4146(3) | -0.6328(2)   | 0.0479          |
| C6   | -0.9538(4) | -0.3690(3) | -0.5926(2)   | 0.0456          |
| C7   | -0.9148(4) | -0.3654(4) | -0.5184(2)   | 0.0639          |
| C8   | -0.8123(4) | -0.3587(4) | -0.5281(2)   | 0.0575          |
| C9   | -0.7980(4) | -0.4029(3) | -0.5974(2)   | 0.0505          |

(9) The occupancies for all atoms listed in this table are 1.0.

Electronic Supplementary Material for Organic & Biomolecular Chemistry  
This journal is © The Royal Society of Chemistry 2006

|     |            |            |              |        |
|-----|------------|------------|--------------|--------|
| C10 | -0.7165(4) | -0.4310(3) | -0.6280(2)   | 0.0562 |
| C11 | -0.7244(4) | -0.4797(3) | -0.6898(2)   | 0.0564 |
| C12 | -0.8096(3) | -0.4960(3) | -0.71947(19) | 0.0436 |
| C13 | -0.8201(4) | -0.5533(3) | -0.7818(2)   | 0.0471 |
| C14 | -0.7439(4) | -0.5890(3) | -0.8155(2)   | 0.0562 |
| C15 | -0.7527(4) | -0.6406(3) | -0.8752(3)   | 0.0564 |
| C16 | -0.8408(4) | -0.6547(4) | -0.8990(2)   | 0.0622 |
| C17 | -0.8719(5) | -0.7039(4) | -0.9627(3)   | 0.0772 |
| C18 | -0.9695(5) | -0.6718(4) | -0.9720(3)   | 0.0769 |
| C19 | -1.0014(4) | -0.6468(3) | -0.8980(2)   | 0.0527 |
| C20 | -0.9132(4) | -0.6192(3) | -0.8625(2)   | 0.0500 |
| C21 | -0.6252(5) | -0.4119(5) | -0.5955(3)   | 0.0821 |
| C22 | -0.6701(5) | -0.6755(5) | -0.9135(4)   | 0.0939 |
| C23 | -1.0785(4) | -0.1816(3) | -0.6576(2)   | 0.0578 |
| C24 | -1.1037(5) | -0.1012(4) | -0.6337(3)   | 0.0868 |
| C25 | -1.1216(7) | -0.0334(5) | -0.6787(4)   | 0.1213 |
| C26 | -1.1185(5) | -0.0464(5) | -0.7491(4)   | 0.0995 |
| C27 | -1.0920(5) | -0.1243(5) | -0.7749(3)   | 0.0950 |
| C28 | -1.0721(5) | -0.1929(4) | -0.7297(3)   | 0.0836 |
| C29 | -1.1927(4) | -0.3509(3) | -0.5795(3)   | 0.0614 |
| C30 | -1.2741(5) | -0.3279(4) | -0.6134(4)   | 0.0802 |
| C31 | -1.3551(6) | -0.3402(5) | -0.5775(6)   | 0.1098 |
| C32 | -1.3550(9) | -0.3736(6) | -0.5123(7)   | 0.1232 |
| C33 | -1.2777(8) | -0.3958(5) | -0.4796(5)   | 0.1094 |
| C34 | -1.1962(5) | -0.3859(4) | -0.5133(3)   | 0.0760 |
| C35 | -1.2313(4) | -0.5953(3) | -0.9303(3)   | 0.0606 |
| C36 | -1.2136(5) | -0.5690(4) | -0.9990(3)   | 0.0710 |
| C37 | -1.2844(6) | -0.5472(5) | -1.0418(4)   | 0.0921 |
| C38 | -1.3726(6) | -0.5498(5) | -1.0187(4)   | 0.0911 |

Electronic Supplementary Material for Organic & Biomolecular Chemistry  
This journal is © The Royal Society of Chemistry 2006

|      |            |            |            |          |
|------|------------|------------|------------|----------|
| C39  | -1.3900(6) | -0.5756(5) | -0.9532(4) | 0.0927   |
| C40  | -1.3200(5) | -0.5991(4) | -0.9075(3) | 0.0717   |
| C41  | -1.1869(4) | -0.7712(3) | -0.8270(3) | 0.0604   |
| C42  | -1.2522(6) | -0.8311(5) | -0.8497(4) | 0.0979   |
| C43  | -1.3089(6) | -0.8702(6) | -0.7996(5) | 0.1205   |
| C44  | -1.2974(6) | -0.8566(5) | -0.7308(5) | 0.1054   |
| C45  | -1.2307(6) | -0.8003(4) | -0.7077(4) | 0.0898   |
| C46  | -1.1760(5) | -0.7582(4) | -0.7552(3) | 0.0799   |
| Cl5  | 0.4148(5)  | 0.1049(4)  | 0.1749(3)  | 0.158(2) |
| Cl6  | 0.4107(6)  | 0.0982(6)  | 0.3254(4)  | 0.201(3) |
| C47  | 0.3545(16) | 0.1399(16) | 0.2415(12) | 0.152(8) |
| H11  | -1.0600    | -0.2360    | -0.5619    | 0.060    |
| H21  | -1.1153    | -0.3507    | -0.6674    | 0.063    |
| H31  | -1.1705    | -0.6042    | -0.8355    | 0.063    |
| H41  | -1.1397    | -0.7454    | -0.9250    | 0.071    |
| H71  | -0.9300    | -0.4166    | -0.4924    | 0.089    |
| H72  | -0.9364    | -0.3150    | -0.4942    | 0.089    |
| H81  | -0.7929    | -0.2993    | -0.5303    | 0.084    |
| H82  | -0.7805    | -0.3881    | -0.4915    | 0.084    |
| H111 | -0.6713    | -0.5021    | -0.7117    | 0.079    |
| H141 | -0.6853    | -0.5768    | -0.7971    | 0.075    |
| H171 | -0.8695    | -0.7654    | -0.9546    | 0.108    |
| H172 | -0.8358    | -0.6896    | -1.0024    | 0.108    |
| H181 | -1.0063    | -0.7176    | -0.9903    | 0.103    |
| H182 | -0.9717    | -0.6227    | -1.0028    | 0.103    |
| H211 | -0.5788    | -0.4363    | -0.6242    | 0.109    |
| H212 | -0.6226    | -0.4375    | -0.5500    | 0.109    |
| H213 | -0.6166    | -0.3503    | -0.5918    | 0.109    |
| H221 | -0.6883    | -0.7100    | -0.9526    | 0.128    |

|      |         |         |         |       |
|------|---------|---------|---------|-------|
| H222 | -0.6350 | -0.6271 | -0.9294 | 0.128 |
| H223 | -0.6347 | -0.7103 | -0.8824 | 0.128 |
| H241 | -1.1051 | -0.0911 | -0.5844 | 0.107 |
| H251 | -1.1404 | 0.0215  | -0.6601 | 0.140 |
| H261 | -1.1336 | 0.0000  | -0.7804 | 0.118 |
| H271 | -1.0873 | -0.1334 | -0.8242 | 0.125 |
| H281 | -1.0532 | -0.2481 | -0.7477 | 0.110 |
| H301 | -1.2722 | -0.3054 | -0.6600 | 0.101 |
| H311 | -1.4103 | -0.3240 | -0.5998 | 0.129 |
| H321 | -1.4120 | -0.3818 | -0.4898 | 0.132 |
| H331 | -1.2820 | -0.4176 | -0.4329 | 0.118 |
| H341 | -1.1423 | -0.4044 | -0.4902 | 0.087 |
| H361 | -1.1530 | -0.5678 | -1.0162 | 0.085 |
| H371 | -1.2725 | -0.5286 | -1.0886 | 0.109 |
| H381 | -1.4211 | -0.5335 | -1.0489 | 0.120 |
| H391 | -1.4511 | -0.5787 | -0.9374 | 0.118 |
| H401 | -1.3330 | -0.6168 | -0.8606 | 0.086 |
| H421 | -1.2601 | -0.8411 | -0.8987 | 0.104 |
| H431 | -1.3514 | -0.9129 | -0.8154 | 0.144 |
| H441 | -1.3394 | -0.8821 | -0.6989 | 0.122 |
| H451 | -1.2207 | -0.7920 | -0.6588 | 0.104 |
| H461 | -1.1308 | -0.7182 | -0.7396 | 0.092 |
| H471 | 0.3522  | 0.2022  | 0.2410  | 0.12  |
| H472 | 0.2948  | 0.1170  | 0.2379  | 0.12  |

**Table 3.3.** Bond Lengths (Å) for the *bis*-2,2'-Bipyridyl Ligand Copper(I) Chloride Complex **18**

|          |          |
|----------|----------|
| Cu1-N3*  | 2.057(4) |
| Cu1-N2*  | 2.052(4) |
| Cu1-C13* | 2.846(5) |

Electronic Supplementary Material for Organic & Biomolecular Chemistry  
This journal is © The Royal Society of Chemistry 2006

|          |          |
|----------|----------|
| Cu1-N1   | 2.057(4) |
| Cu1-N2   | 2.052(4) |
| Cu1-C13  | 2.846(5) |
| Cu2-Cl1' | 2.060(4) |
| Cu2-Cl1  | 2.060(4) |
| O1-C4    | 1.433(6) |
| O1-C19   | 1.418(6) |
| O2-C3    | 1.453(6) |
| O2-C19   | 1.402(6) |
| O3-C2    | 1.438(6) |
| O3-C6    | 1.384(6) |
| O4-C1    | 1.443(6) |
| O4-C6    | 1.435(6) |
| N1-C13   | 1.351(6) |
| N1-C20   | 1.344(6) |
| N2-C5    | 1.355(5) |
| N2-C12   | 1.355(6) |
| C1-C2    | 1.521(7) |
| C1-C23   | 1.494(7) |
| C2-C29   | 1.507(8) |
| C3-C4    | 1.533(7) |
| C3-C35   | 1.506(7) |
| C4-C41   | 1.495(8) |
| C5-C6    | 1.514(7) |
| C5-C9    | 1.378(7) |
| C6-C7    | 1.526(6) |
| C7-C8    | 1.525(8) |
| C8-C9    | 1.495(7) |
| C9-C10   | 1.402(8) |

Electronic Supplementary Material for Organic & Biomolecular Chemistry  
This journal is © The Royal Society of Chemistry 2006

|         |           |
|---------|-----------|
| C10-C11 | 1.395(7)  |
| C10-C21 | 1.508(8)  |
| C11-C12 | 1.398(7)  |
| C12-C13 | 1.480(6)  |
| C13-C14 | 1.402(7)  |
| C14-C15 | 1.388(7)  |
| C15-C16 | 1.391(8)  |
| C15-C22 | 1.514(8)  |
| C16-C17 | 1.495(7)  |
| C16-C20 | 1.383(7)  |
| C17-C18 | 1.529(9)  |
| C18-C19 | 1.532(6)  |
| C19-C20 | 1.522(7)  |
| C23-C24 | 1.359(8)  |
| C23-C28 | 1.386(7)  |
| C24-C25 | 1.368(9)  |
| C25-C26 | 1.355(10) |
| C26-C27 | 1.342(9)  |
| C27-C28 | 1.384(8)  |
| C29-C30 | 1.407(9)  |
| C29-C34 | 1.368(8)  |
| C30-C31 | 1.388(11) |
| C31-C32 | 1.341(14) |
| C32-C33 | 1.342(14) |
| C33-C34 | 1.370(11) |
| C35-C36 | 1.391(8)  |
| C35-C40 | 1.379(8)  |
| C36-C37 | 1.365(9)  |
| C37-C38 | 1.372(11) |

|         |           |
|---------|-----------|
| C38-C39 | 1.332(10) |
| C39-C40 | 1.395(9)  |
| C41-C42 | 1.395(8)  |
| C41-C46 | 1.389(8)  |
| C42-C43 | 1.401(11) |
| C43-C44 | 1.336(11) |
| C44-C45 | 1.376(10) |
| C45-C46 | 1.372(9)  |
| C15-C47 | 1.64(2)   |
| C16-C47 | 1.91(2)   |

**Table 3.4.** Bond Angles (°) for the *bis*-2,2'-Bipyridyl Ligand Copper(I) Chloride Complex **18**

|              |            |
|--------------|------------|
| N1*-Cu1-N2*  | 82.23(15)  |
| N1*-Cu1-C13* | 26.20(14)  |
| N2*-Cu1-C13* | 56.08(14)  |
| N1*-Cu1-N1   | 117.46(19) |
| N2*-Cu1-N1   | 131.17(14) |
| C13*-Cu1-N1  | 131.46(14) |
| N1*-Cu1-N2   | 131.17(14) |
| N2*-Cu1-N2   | 119.49(19) |
| C13*-Cu1-N2  | 141.85(13) |
| N1-Cu1-N2    | 82.23(15)  |
| N1*-Cu1-C13  | 131.46(14) |
| N2*-Cu1-C13  | 141.85(13) |
| C13*-Cu1-C13 | 153.81(17) |
| N1-Cu1-C13   | 26.20(14)  |
| N2-Cu1-C13   | 56.08(14)  |
| C11'-Cu2-C11 | 176.95(17) |
| C4-O1-C19    | 105.0(4)   |



Electronic Supplementary Material for Organic & Biomolecular Chemistry  
This journal is © The Royal Society of Chemistry 2006

|            |          |
|------------|----------|
| C3-O2-C19  | 108.8(4) |
| C2-O3-C6   | 109.8(4) |
| C1-O4-C6   | 106.1(3) |
| Cu1-N1-C13 | 111.6(3) |
| Cu1-N1-C20 | 131.3(3) |
| C13-N1-C20 | 116.5(4) |
| Cu1-N2-C5  | 130.8(3) |
| Cu1-N2-C12 | 112.4(3) |
| C5-N2-C12  | 116.2(4) |
| O4-C1-C2   | 100.9(4) |
| O4-C1-C23  | 109.9(4) |
| C2-C1-C23  | 117.3(4) |
| C1-C2-O3   | 103.3(4) |
| C1-C2-C29  | 116.3(4) |
| O3-C2-C29  | 110.6(4) |
| O2-C3-C4   | 102.8(4) |
| O2-C3-C35  | 112.3(4) |
| C4-C3-C35  | 116.8(4) |
| C3-C4-O1   | 102.2(4) |
| C3-C4-C41  | 113.7(5) |
| O1-C4-C41  | 111.4(4) |
| N2-C5-C6   | 127.0(4) |
| N2-C5-C9   | 124.0(4) |
| C6-C5-C9   | 109.0(4) |
| C5-C6-O4   | 106.6(4) |
| C5-C6-O3   | 117.8(4) |
| O4-C6-O3   | 106.6(4) |
| C5-C6-C7   | 102.0(4) |
| O4-C6-C7   | 110.9(4) |

Electronic Supplementary Material for Organic & Biomolecular Chemistry  
This journal is © The Royal Society of Chemistry 2006

|             |          |
|-------------|----------|
| O3-C6-C7    | 112.8(4) |
| C6C7-C8     | 105.3(4) |
| C7-C8-C9    | 102.5(4) |
| C8-C9-C5    | 111.5(5) |
| C8-C9-C10   | 128.6(5) |
| C5-C9-C10   | 119.8(4) |
| C9-C10-C11  | 116.1(5) |
| C9-C10-C21  | 122.3(5) |
| C11-C10-C21 | 121.6(5) |
| C10-C11-C12 | 120.7(5) |
| C11-C12-N2  | 122.4(4) |
| C11-C12-C13 | 121.5(4) |
| N2-12-C13   | 116.1(4) |
| C12-C13-N1  | 117.5(4) |
| C12-C13-Cu1 | 75.4(3)  |
| N1-C13-Cu1  | 42.2(2)  |
| C12-C13-C14 | 120.7(4) |
| N1-C13-C14  | 121.8(4) |
| Cu1-C13-C14 | 163.7(4) |
| C13-C14-C15 | 121.3(5) |
| C14-C15-C16 | 116.1(5) |
| C14-C15-C22 | 121.2(6) |
| C16-C15-C22 | 122.6(5) |
| C15-C16-C17 | 128.8(5) |
| C15-C16-C20 | 119.8(4) |
| C17-C16-C20 | 111.5(5) |
| C16-C17-C18 | 102.8(5) |
| C17-C18-C19 | 105.1(5) |
| C18-C19-O1  | 112.2(4) |

Electronic Supplementary Material for Organic & Biomolecular Chemistry  
This journal is © The Royal Society of Chemistry 2006

|             |          |
|-------------|----------|
| C18-C19-O2  | 111.0(4) |
| O1-C19-O2   | 106.9(4) |
| C18-C19-C20 | 102.4(5) |
| O1-C19-C20  | 108.7(4) |
| O2-C19-C20  | 115.7(4) |
| C19-C20-C16 | 109.1(4) |
| C19-C20-N1  | 126.4(4) |
| C16-C20-N1  | 124.5(5) |
| C1-C23-C24  | 122.4(5) |
| C1-C23-C28  | 120.0(4) |
| C24-C23-C28 | 117.5(5) |
| C23-C24-C25 | 121.6(6) |
| C24-C25-C26 | 120.1(6) |
| C25-C26-C27 | 120.0(6) |
| C26-C27-C28 | 120.2(6) |
| C23-C28-C27 | 120.4(5) |
| C2-C29-C30  | 119.1(5) |
| C2-C29-C34  | 121.7(6) |
| C30-C29-C34 | 119.2(6) |
| C29-C30-C31 | 118.3(7) |
| C30-C31-C32 | 120.4(9) |
| C31-C32-C33 | 121.7(9) |
| C32-C33-C34 | 120.0(9) |
| C33-C34-C29 | 120.5(8) |
| C3-C35-C36  | 121.1(5) |
| C3-C35-C40  | 119.8(5) |
| C36-C35-C40 | 119.1(5) |
| C35-C36-C37 | 119.2(7) |
| C36-C37-C38 | 121.7(7) |

Electronic Supplementary Material for Organic & Biomolecular Chemistry  
This journal is © The Royal Society of Chemistry 2006

|             |           |
|-------------|-----------|
| C37-C38-C39 | 119.4(6)  |
| C38-C39-C40 | 121.1(7)  |
| C39-C40-C35 | 119.6(6)  |
| C4-C41-C42  | 120.1(5)  |
| C4-C41-C46  | 121.4(5)  |
| C42-C41-C46 | 118.5(6)  |
| C41-C42-C43 | 118.6(7)  |
| C42-C43-C44 | 121.7(7)  |
| C43-C44-C45 | 120.1(7)  |
| C44-C45-C46 | 120.0(6)  |
| C41-C46-C45 | 120.9(6)  |
| C16-C47-C15 | 107.7(13) |

#### 4. $^1\text{H}$ and $^{13}\text{C}$ NMR Spectra

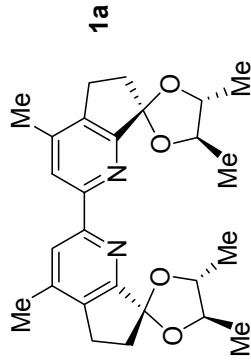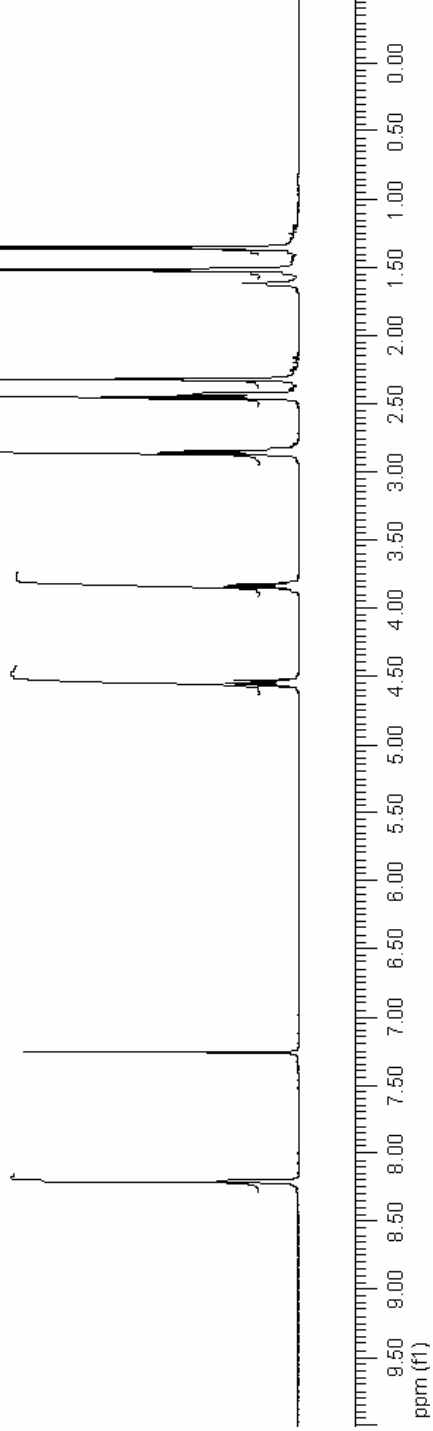

$^1\text{H}$  NMR spectrum (CDCl<sub>3</sub>) of 4,4'-dimethyl-6,6',7,7'-tetrahydro-5*H*,5'*H*-2,2'-bi([1]pyrindinyl)-7,7'-dione  
(2*R*,3*R*)-2,3-butanediol *bis*-acetal **1a**.

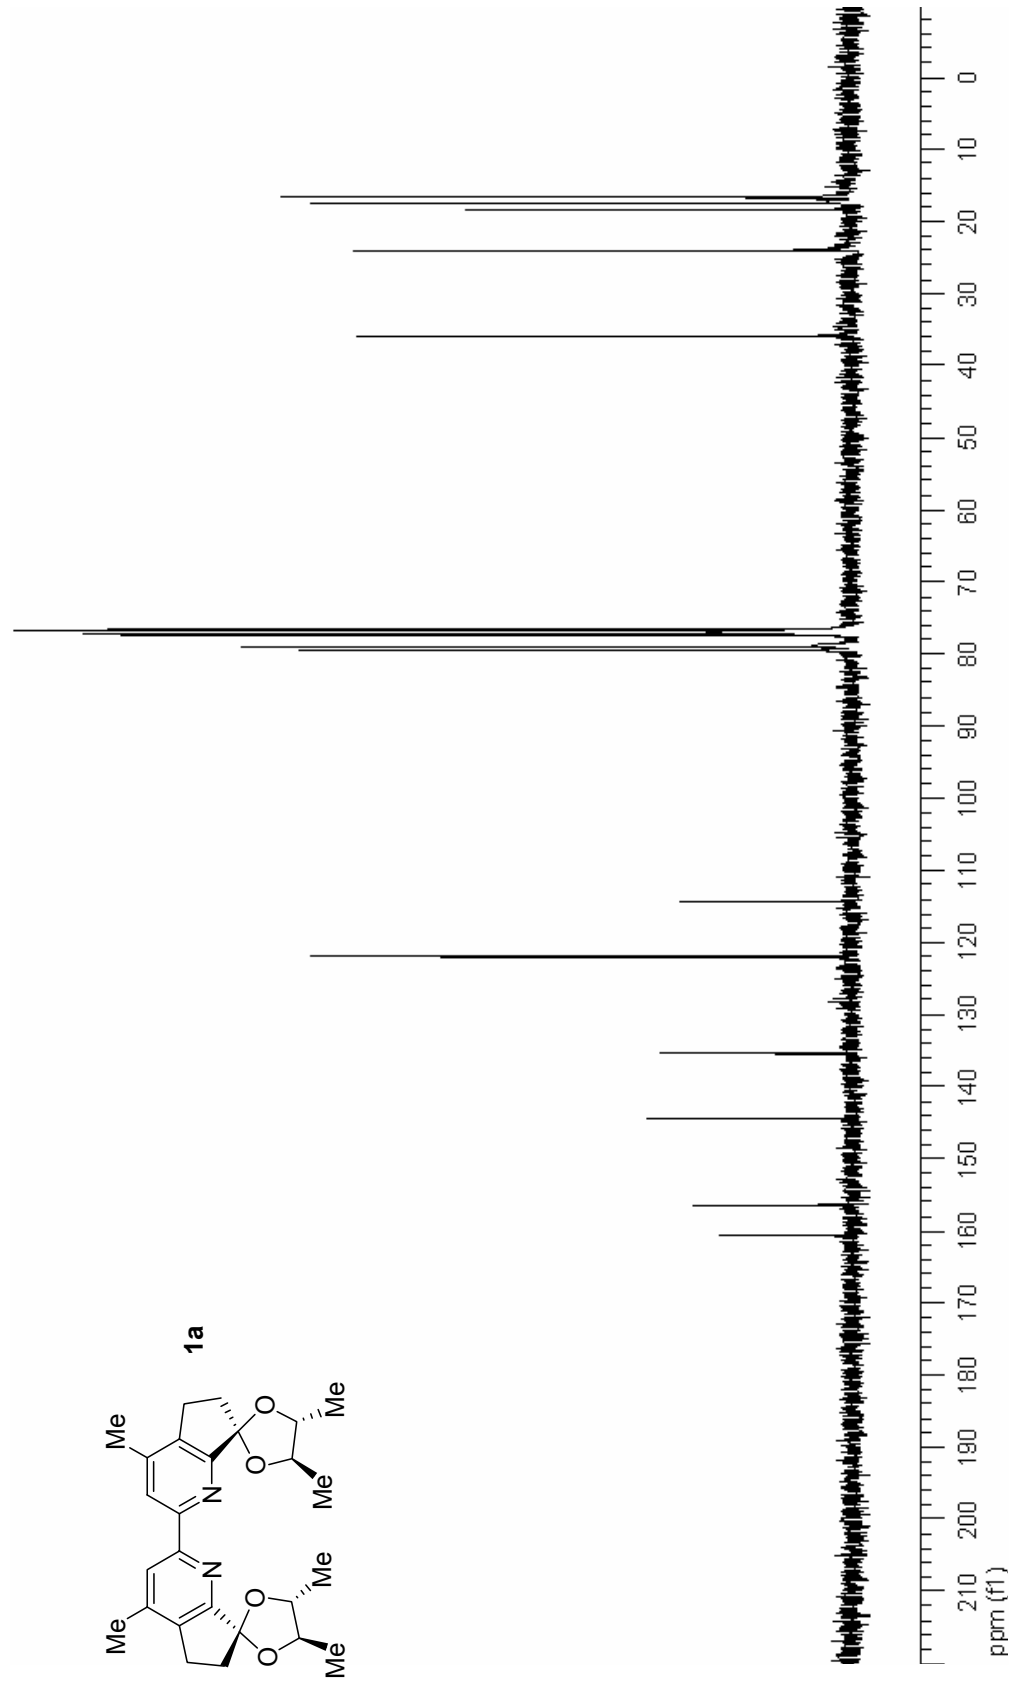

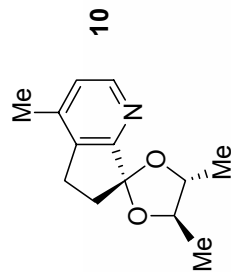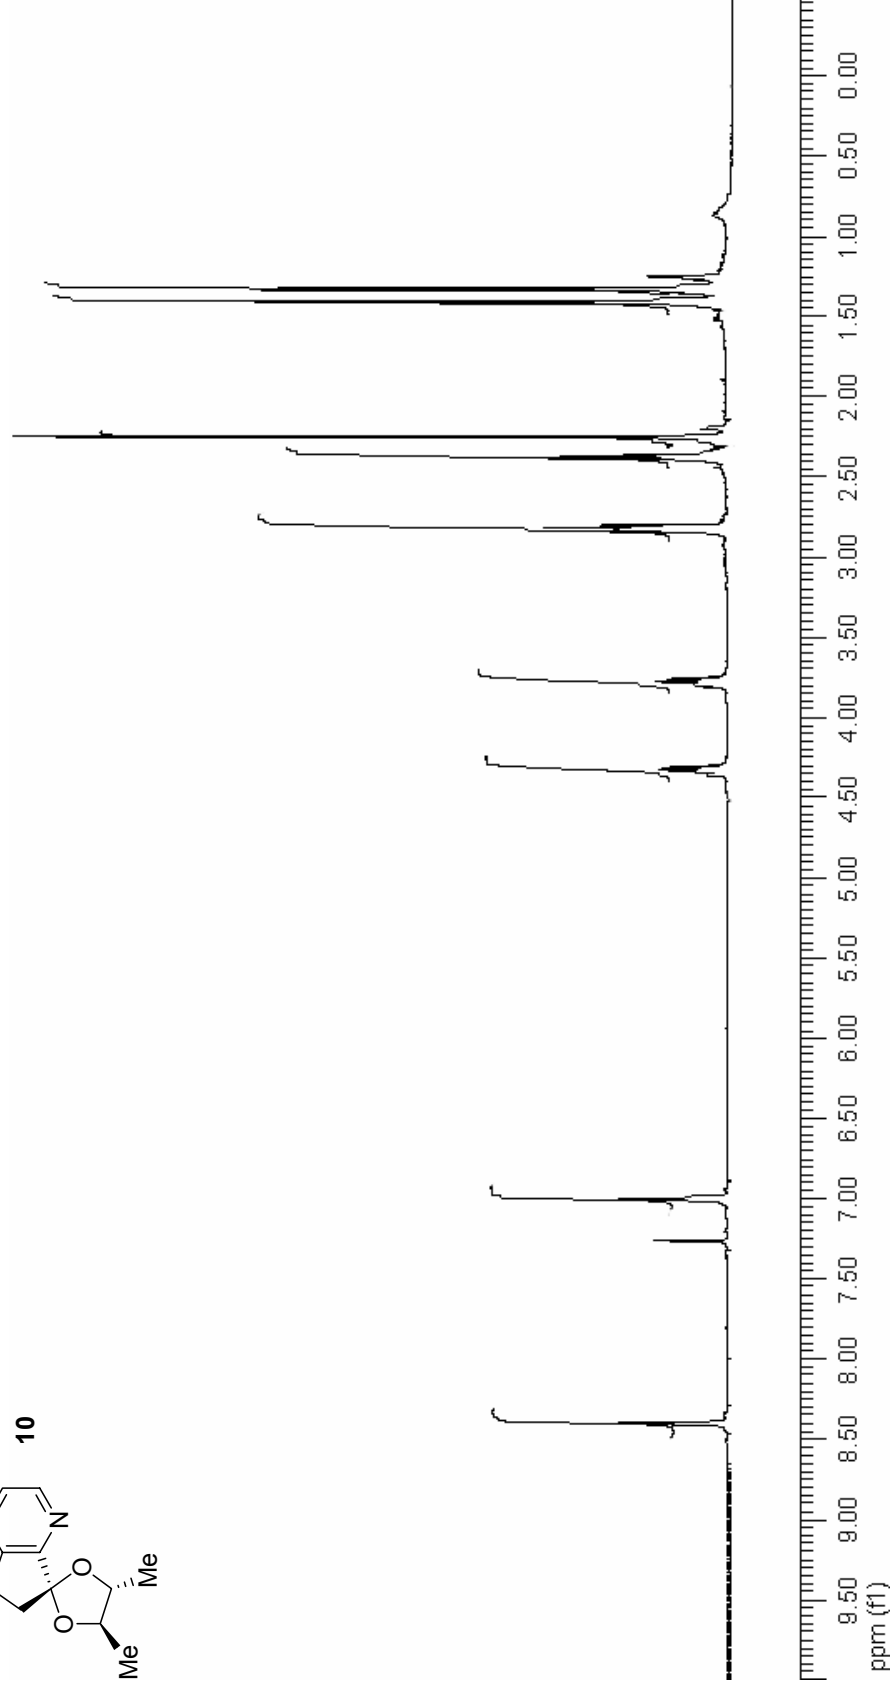

<sup>1</sup>H NMR spectrum (CDCl<sub>3</sub>) of 4-methyl-6,7-dihydro-5H-[1]pyrindin-7-one (2*R*,3*R*)-2,3-butanediol acetal **10**.

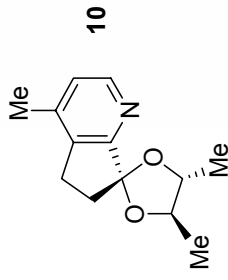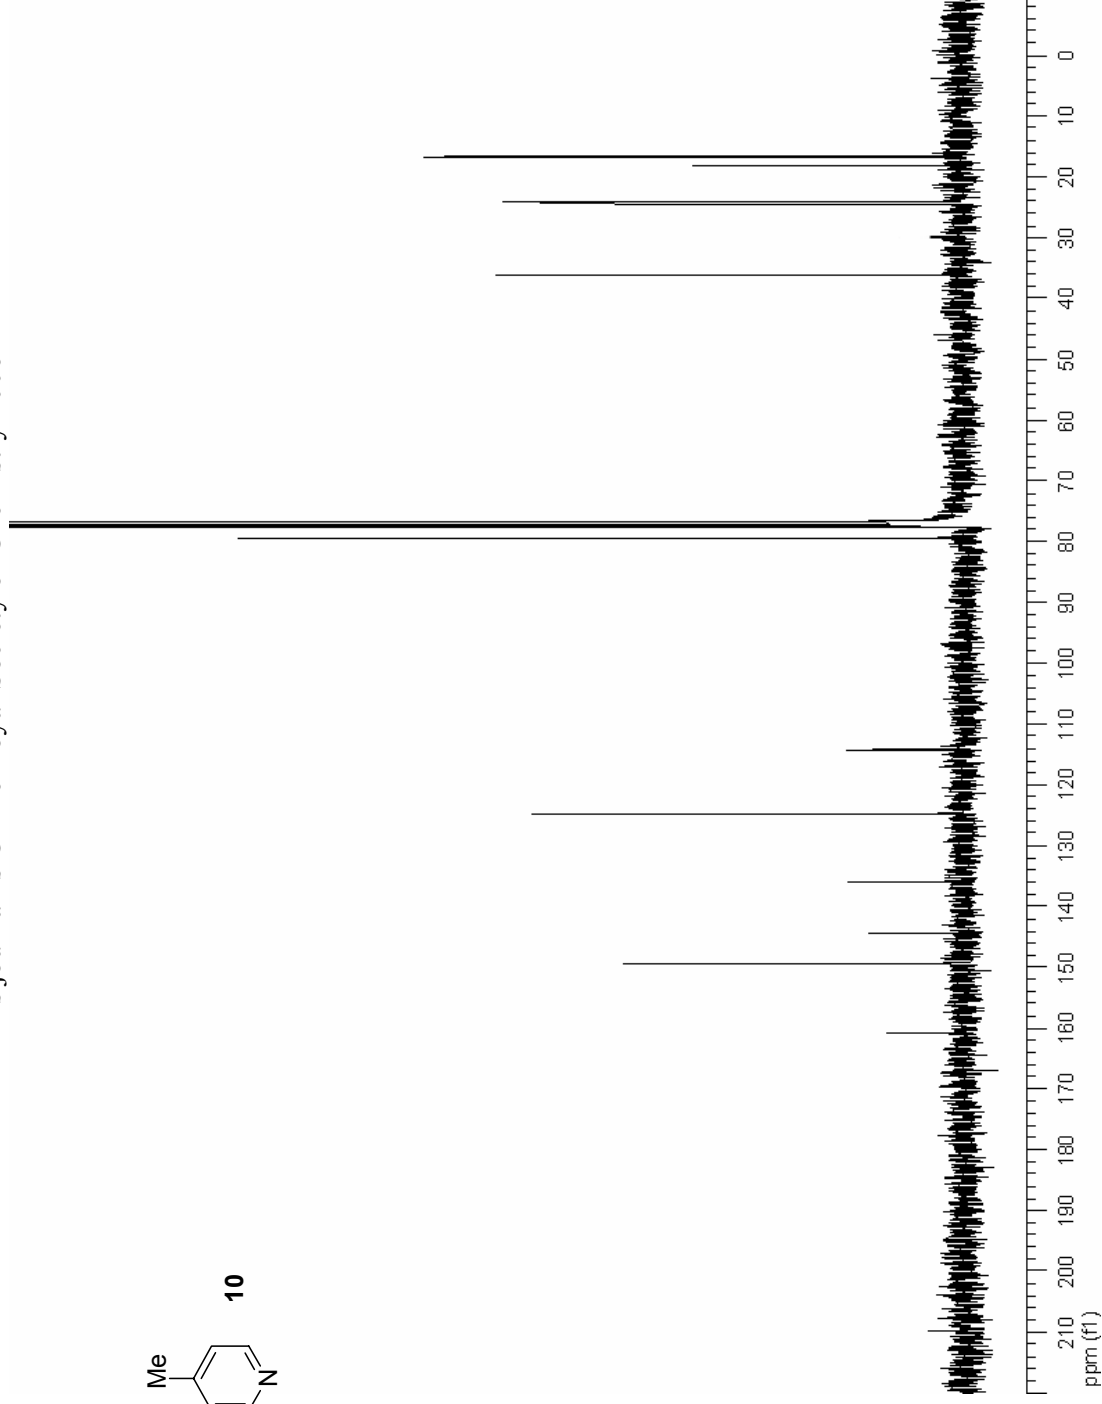

<sup>13</sup>C NMR spectrum (CDCl<sub>3</sub>) of 4-methyl-1,6,7-dihydro-5H-[1]pyrindin-7-one (2*R*,3*R*)-2,3-butanediol acetal **10**.



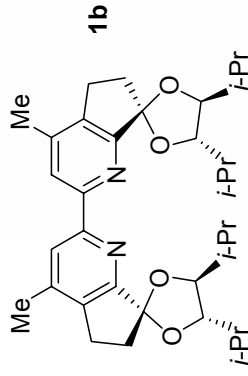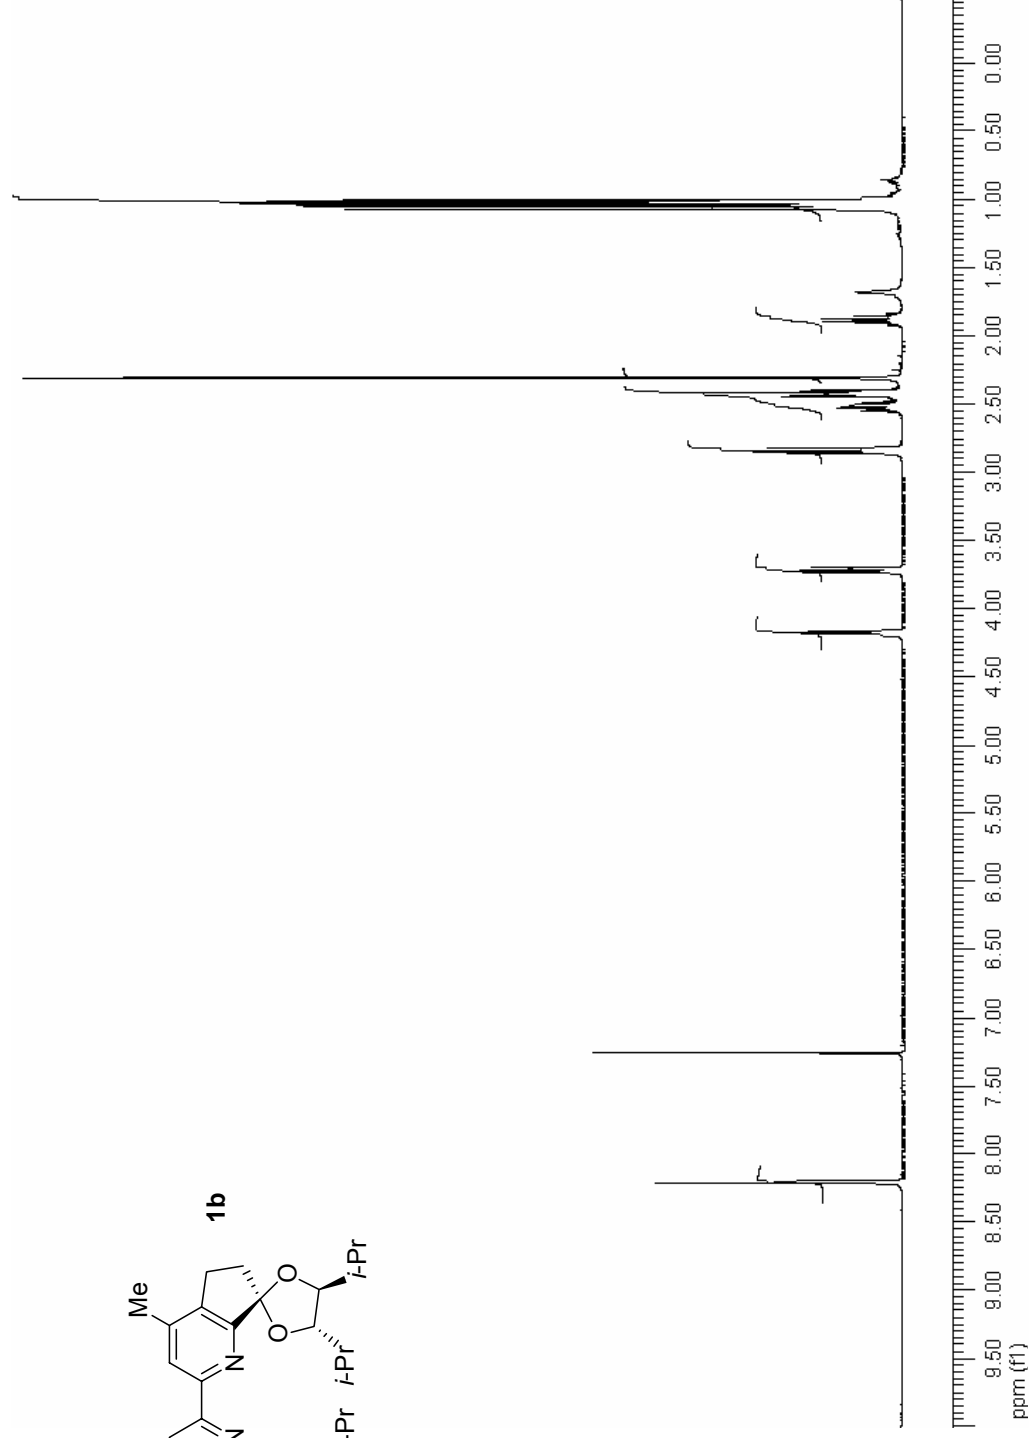

<sup>1</sup>H NMR spectrum (CDCl<sub>3</sub>) of 4,4'-dimethyl-6,6',7,7'-tetrahydro-5H,5'H-2,2'-bi([1]pyrindinyl)-7,7'-dione  
(1*S*,2*S*)-1,2-diisopropyl-1,2-ethanediol bis-acetal **1b**.

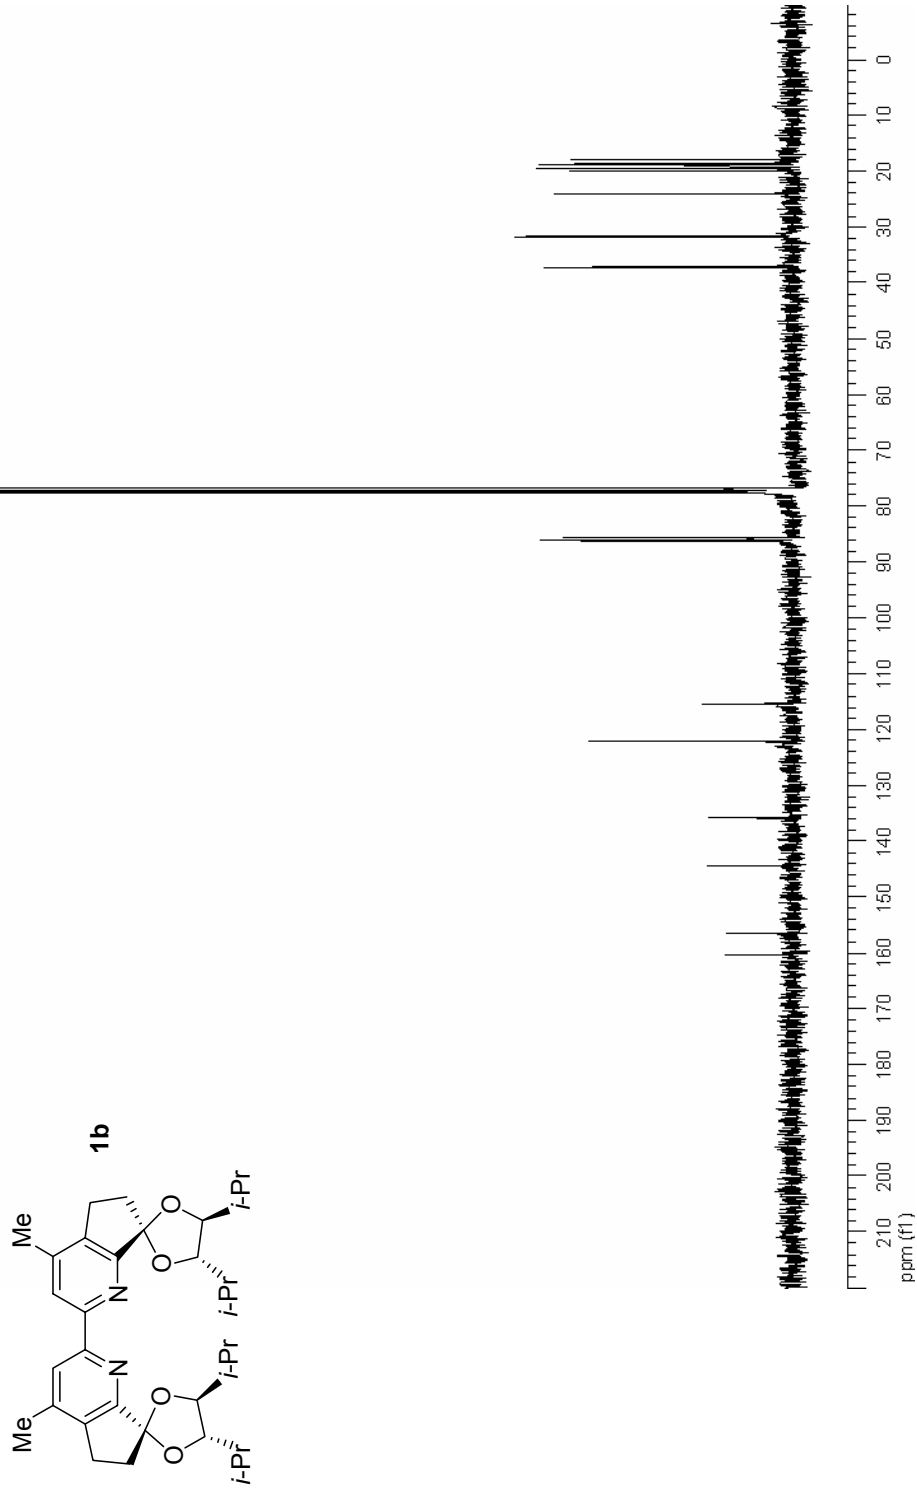

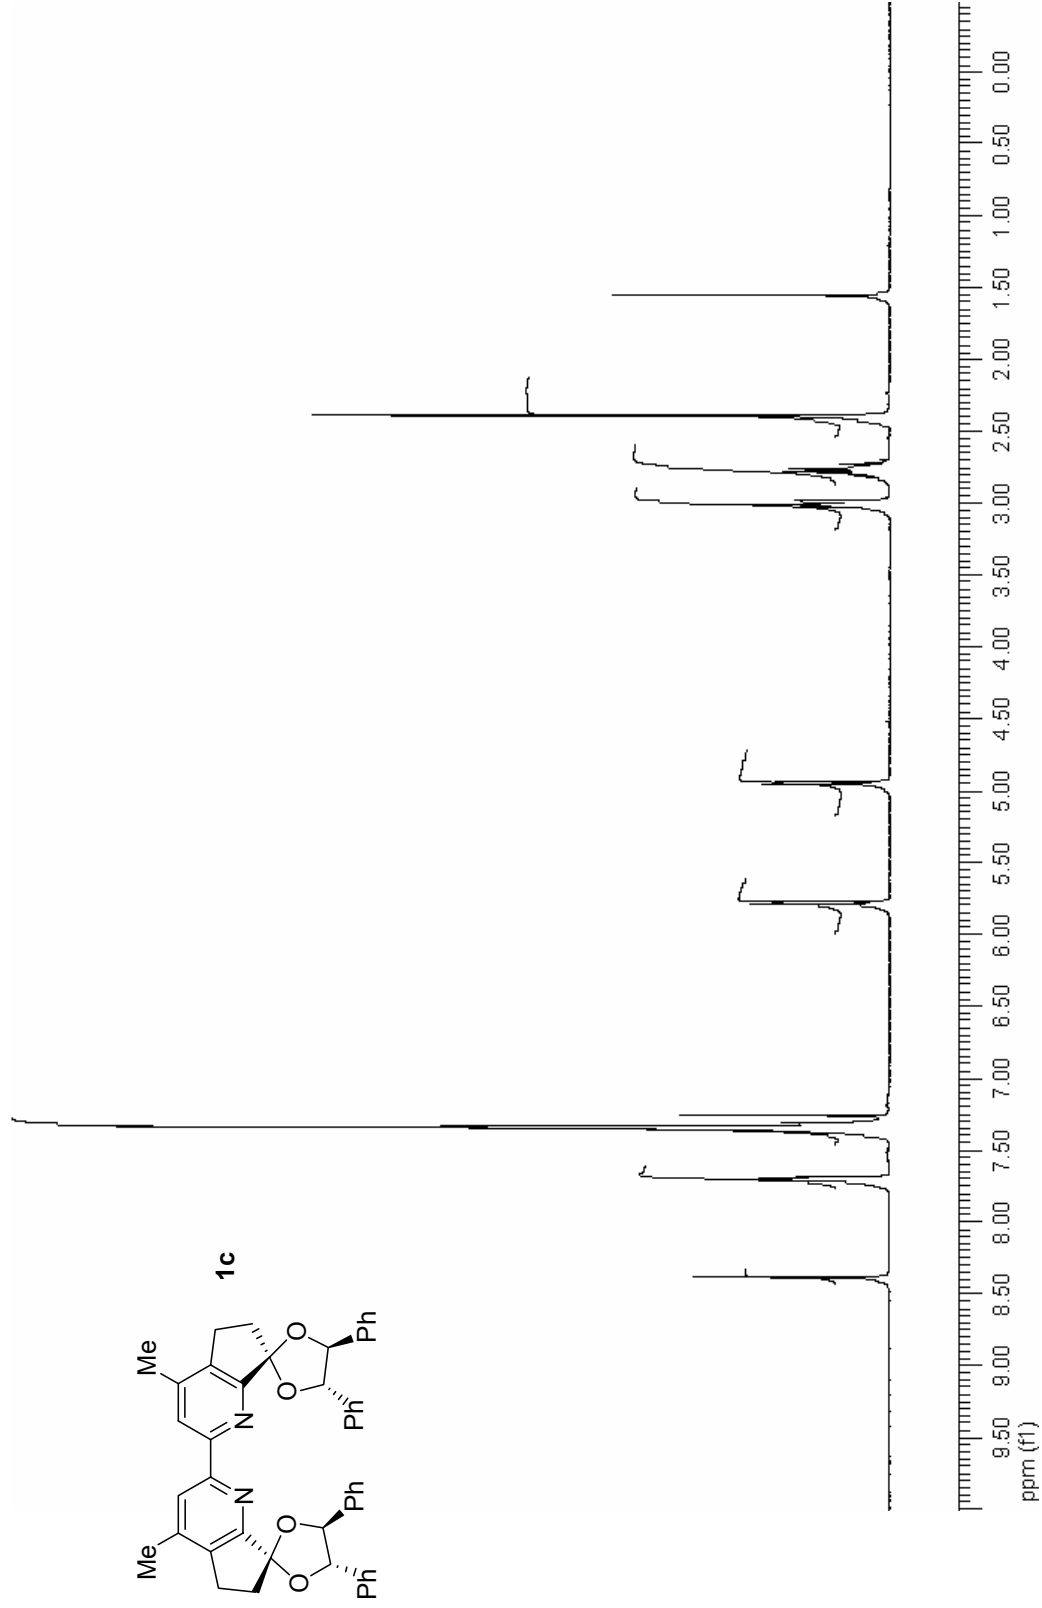

<sup>1</sup>H NMR spectrum (CDCl<sub>3</sub>) of 4,4'-dimethyl-6,6',7,7'-tetrahydro-5H,5'H-2,2'-bi([1]pyrindinyl)-7,7'-dione  
(1*S*,2*S*)-1,2-diphenyl-1,2-ethanediol bis-acetal **1c**.

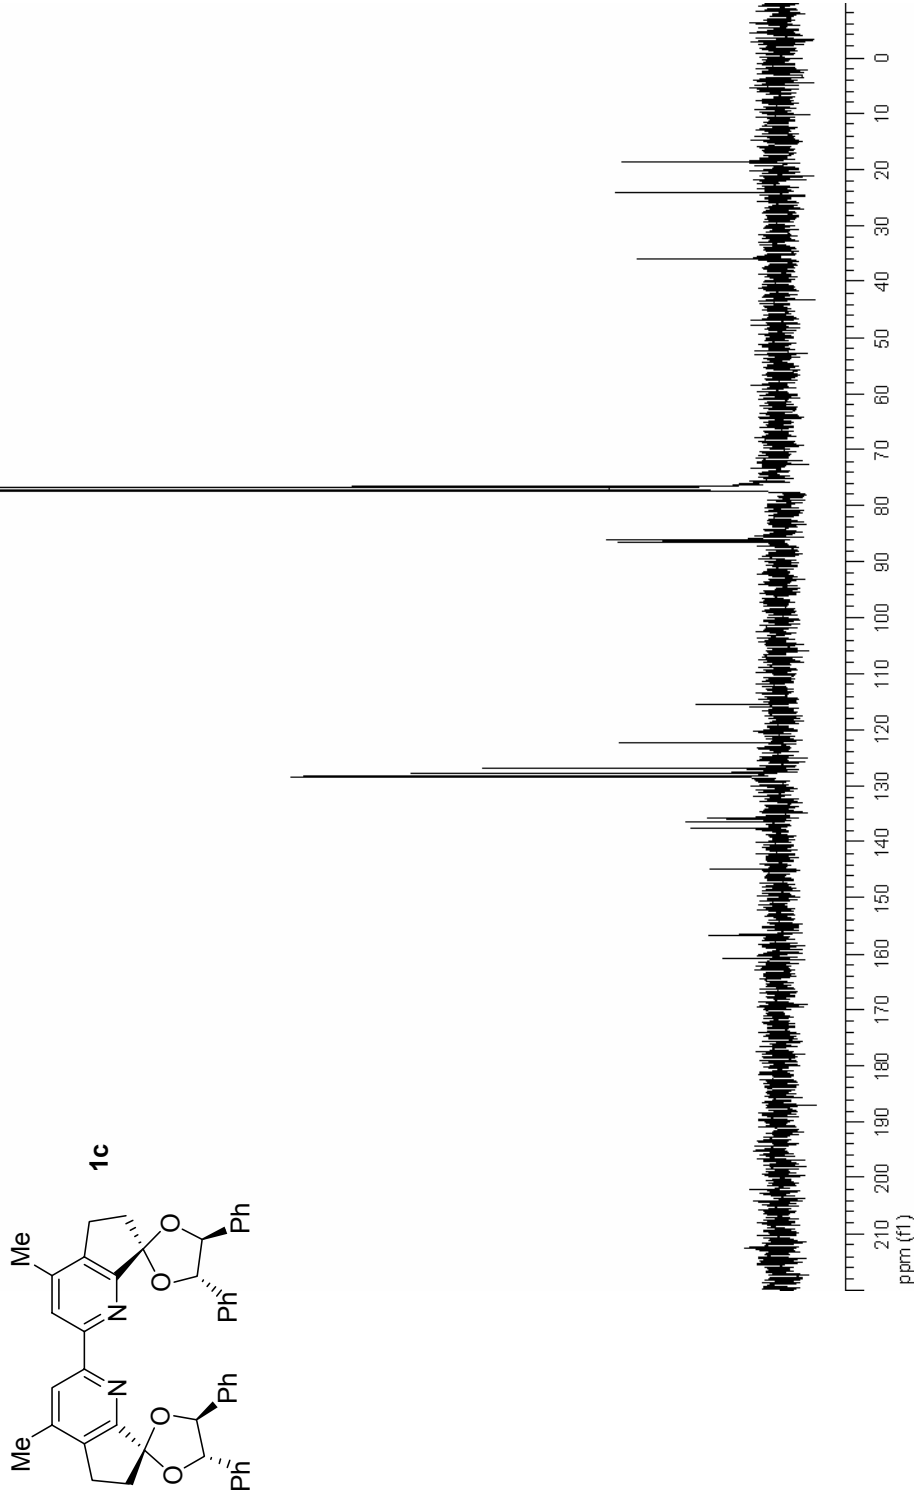

<sup>13</sup>C NMR spectrum (CDCl<sub>3</sub>) of 4,4'-dimethyl-6,6',7,7'-tetrahydro-5H,5'H-2,2'-bi([1]pyrindinyl)-7,7'-dione  
(1*S*,2*S*)-1,2-diphenyl-1,2-ethanediol *bis*-acetal **1c**.

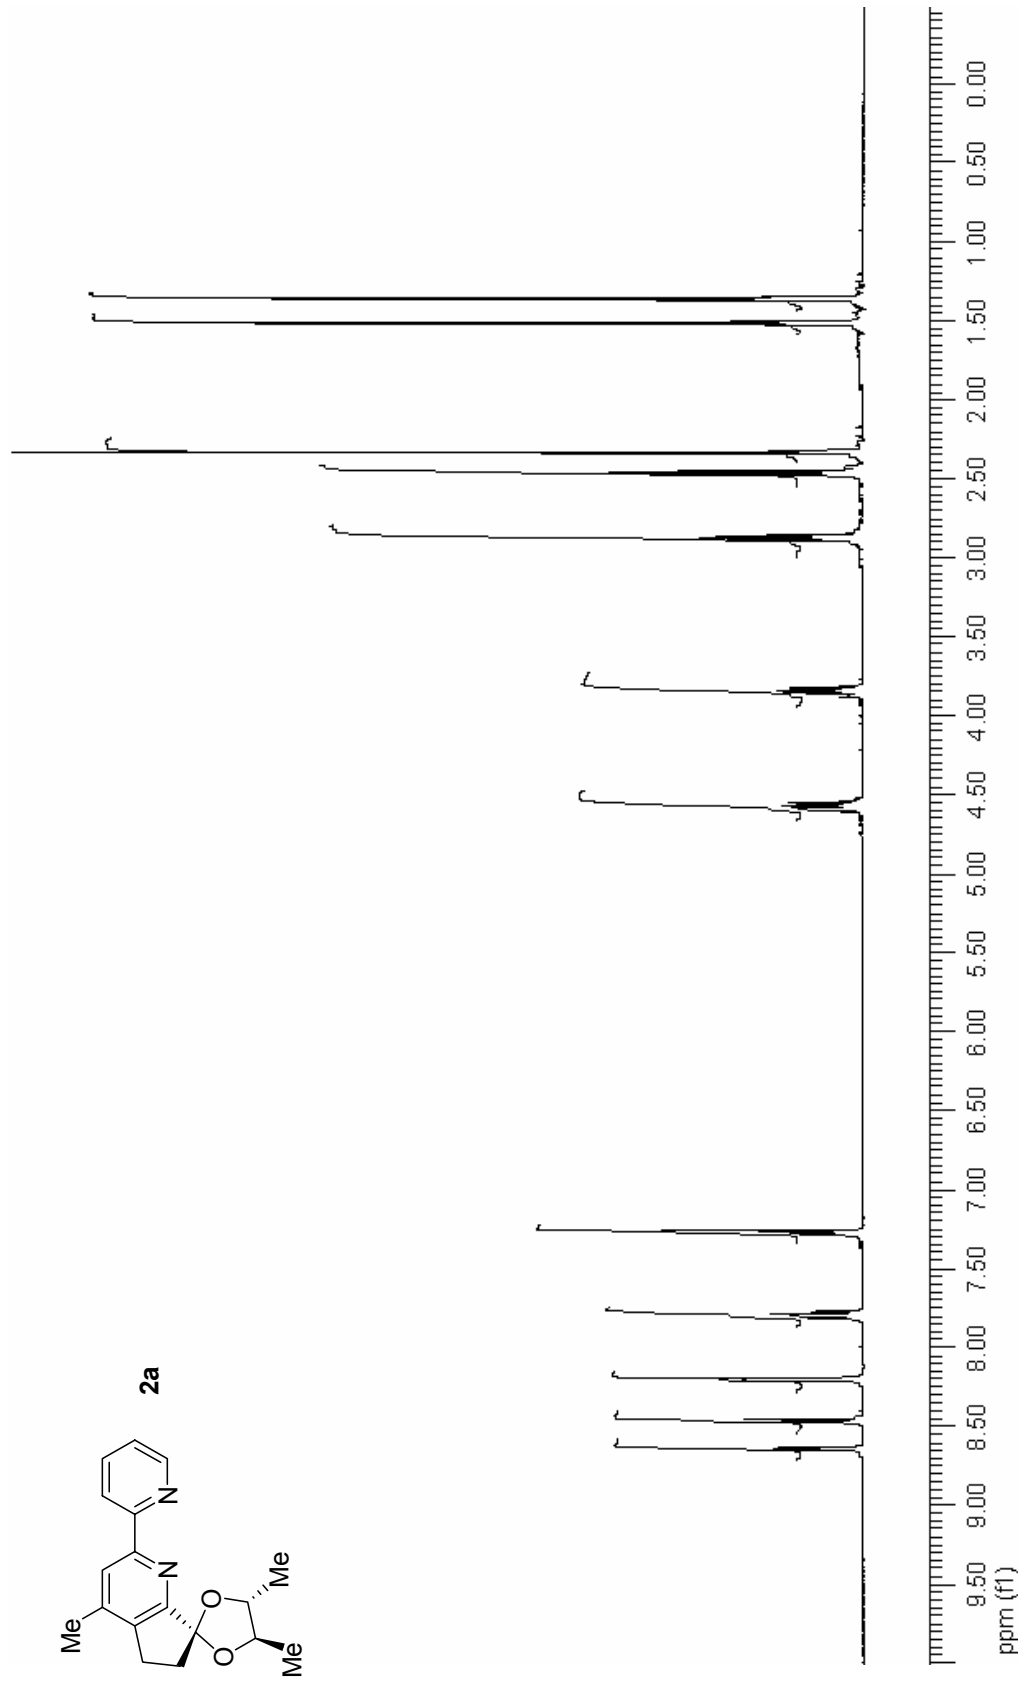

<sup>1</sup>H NMR spectrum (CDCl<sub>3</sub>) of 4-methyl-2-(2'-pyridyl)-6,7-dihydro-5H-[1]pyrindin-7-one (2*R*,3*R*)-2,3-butanediol acetal **2a**.

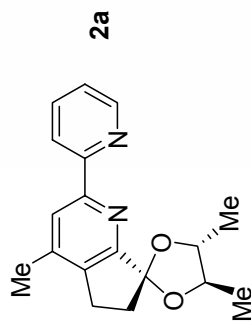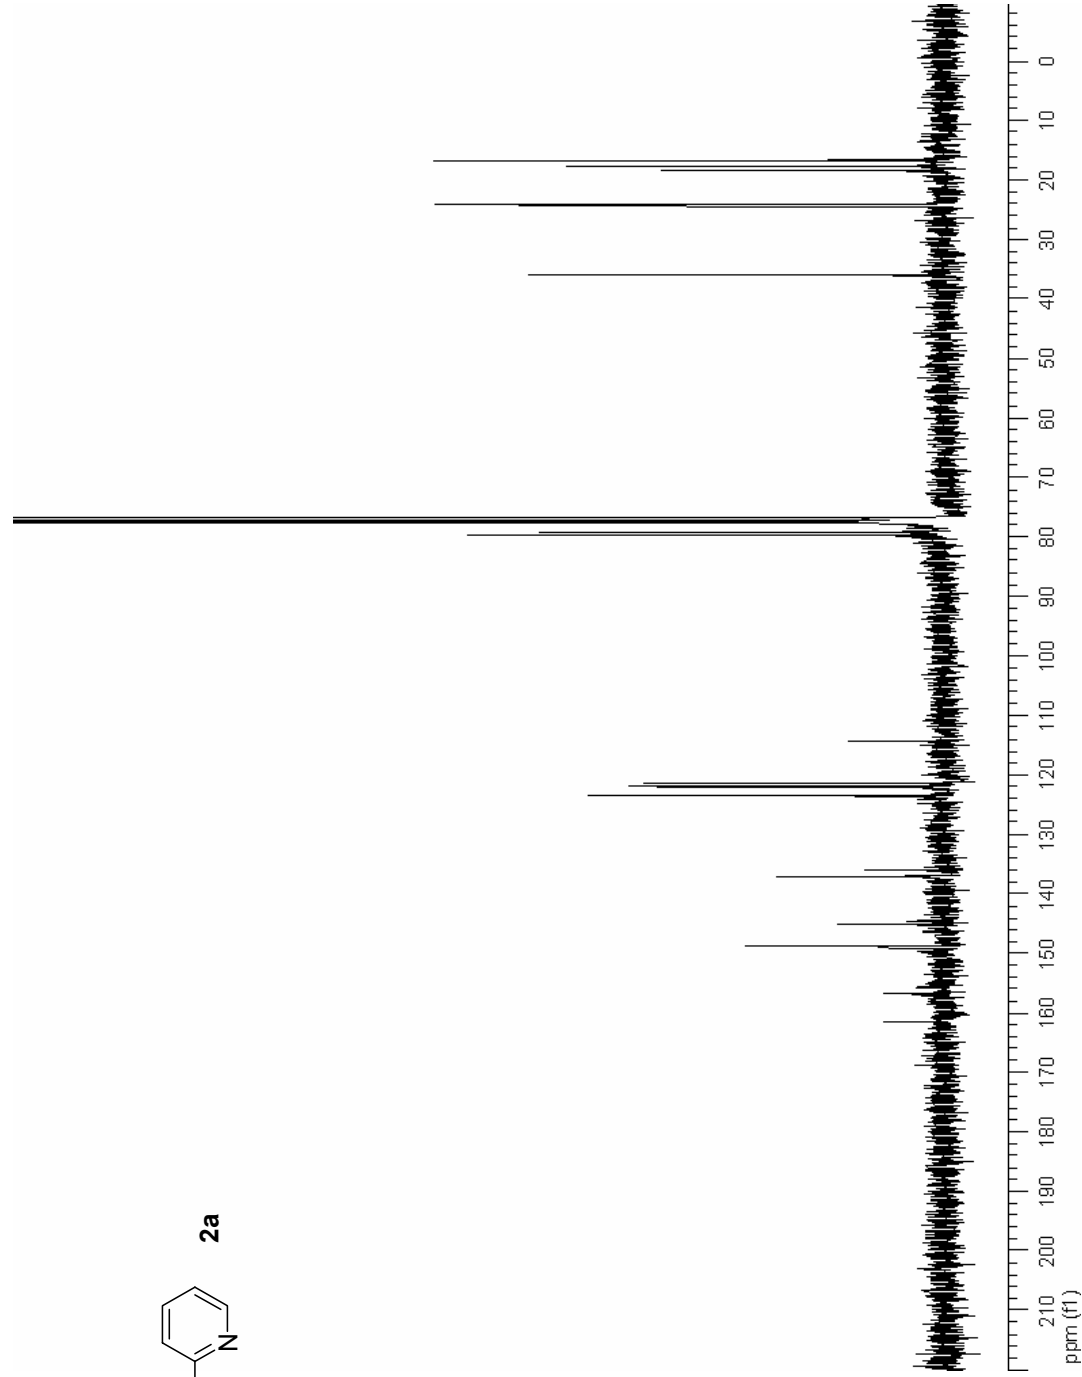

$^{13}\text{C}$  NMR spectrum (CDCl<sub>3</sub>) of 4-methyl-2-(2'-(2'-pyridyl)-6,7-dihydro-5H-[1]pyrindin-7-one (2*R*,3*R*)-2,3,3-butanediol) acetal **2a**.

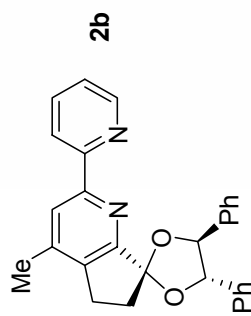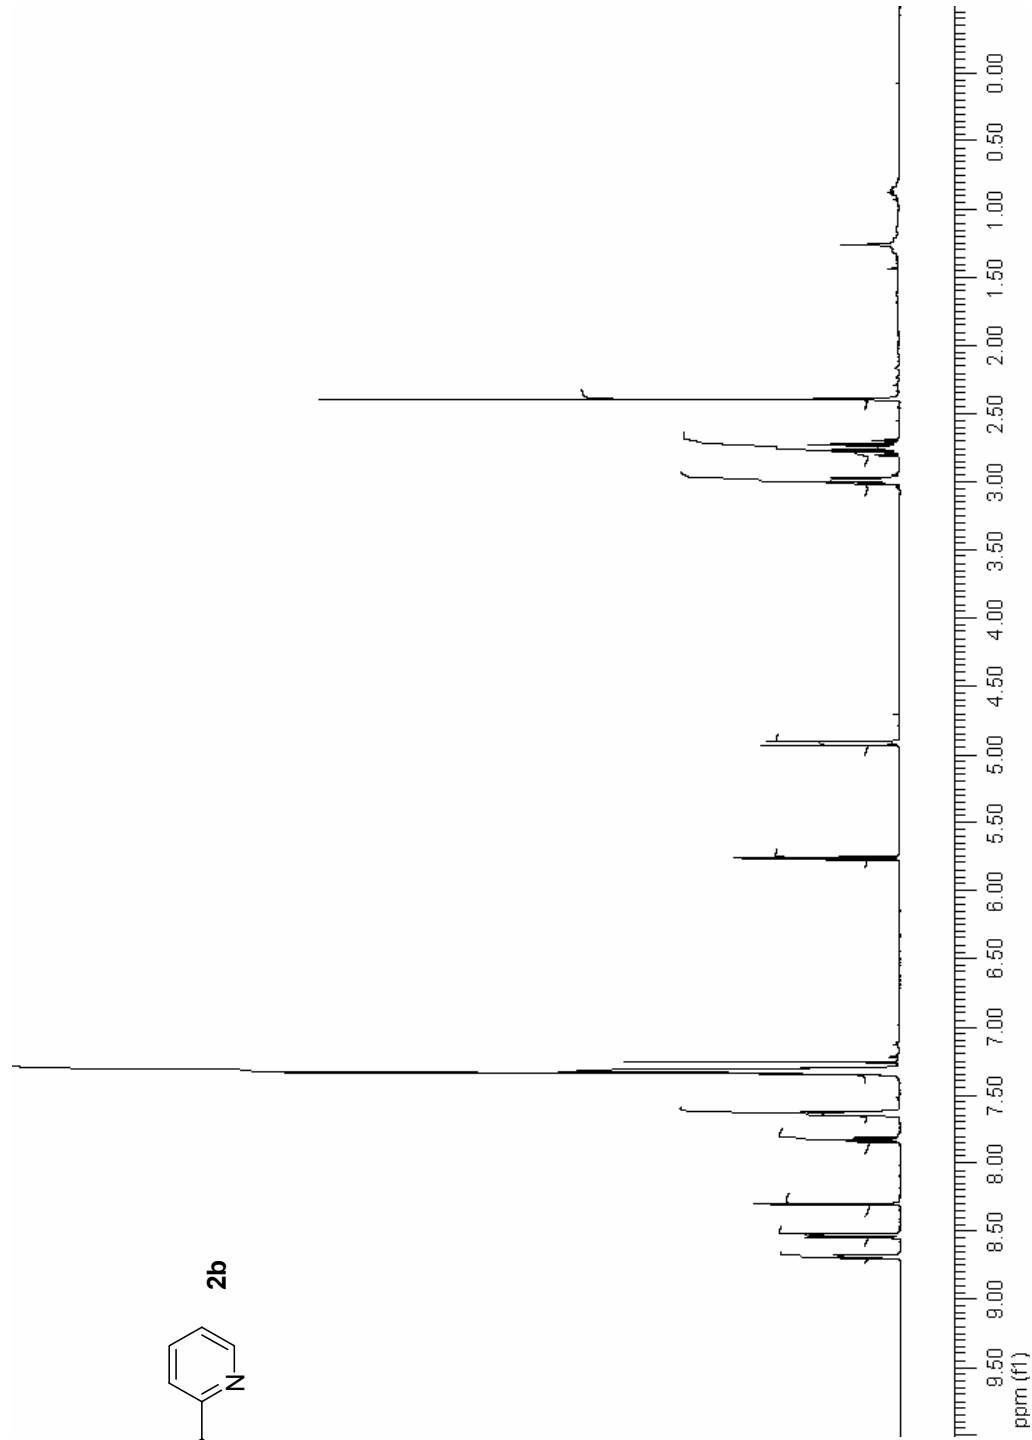

<sup>1</sup>H NMR spectrum (CDCl<sub>3</sub>) of 4-methyl-2-(2'-pyridyl)-6,7-dihydro-5*H*-[1]pyrindin-7-one (1*S*,2*S*)-1,2-diphenyl-1,2-ethanediol acetal **2b**.

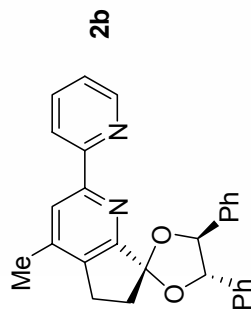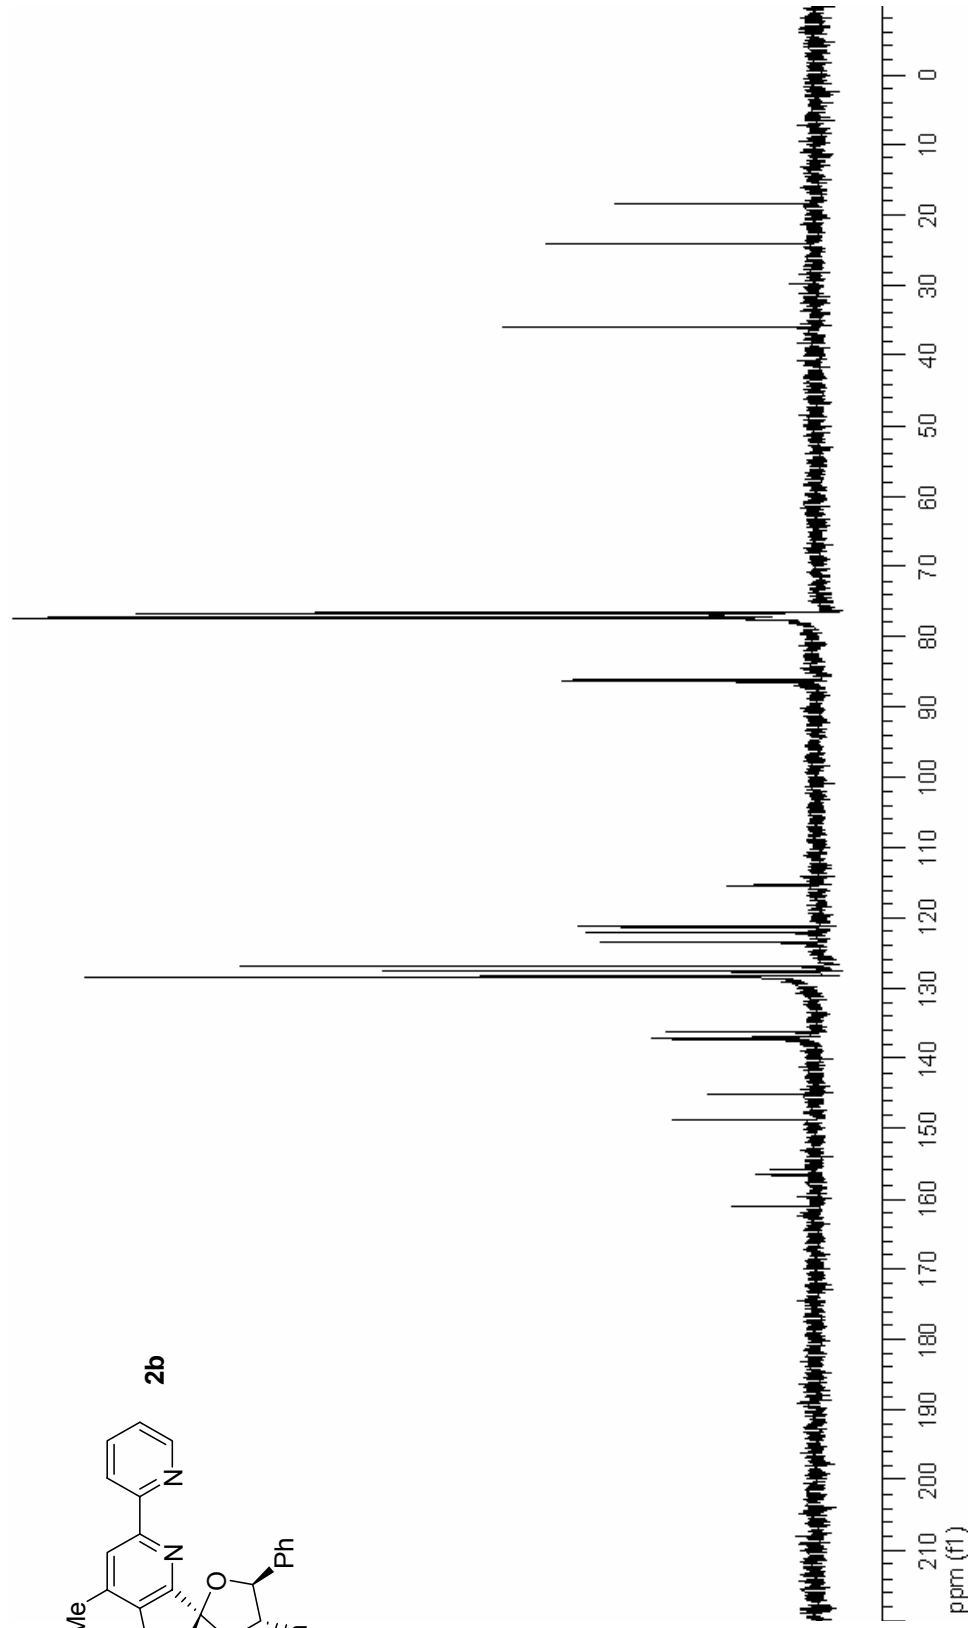

$^{13}\text{C}$  NMR spectrum ( $\text{CDCl}_3$ ) of 4-methyl-2-(2'-pyridyl)-6,7-dihydro-5H-[1]pyrindin-7-one  
(1*S*,2*S*)-1,2-diphenyl-1,2-ethanediol acetal **2b**.



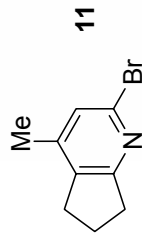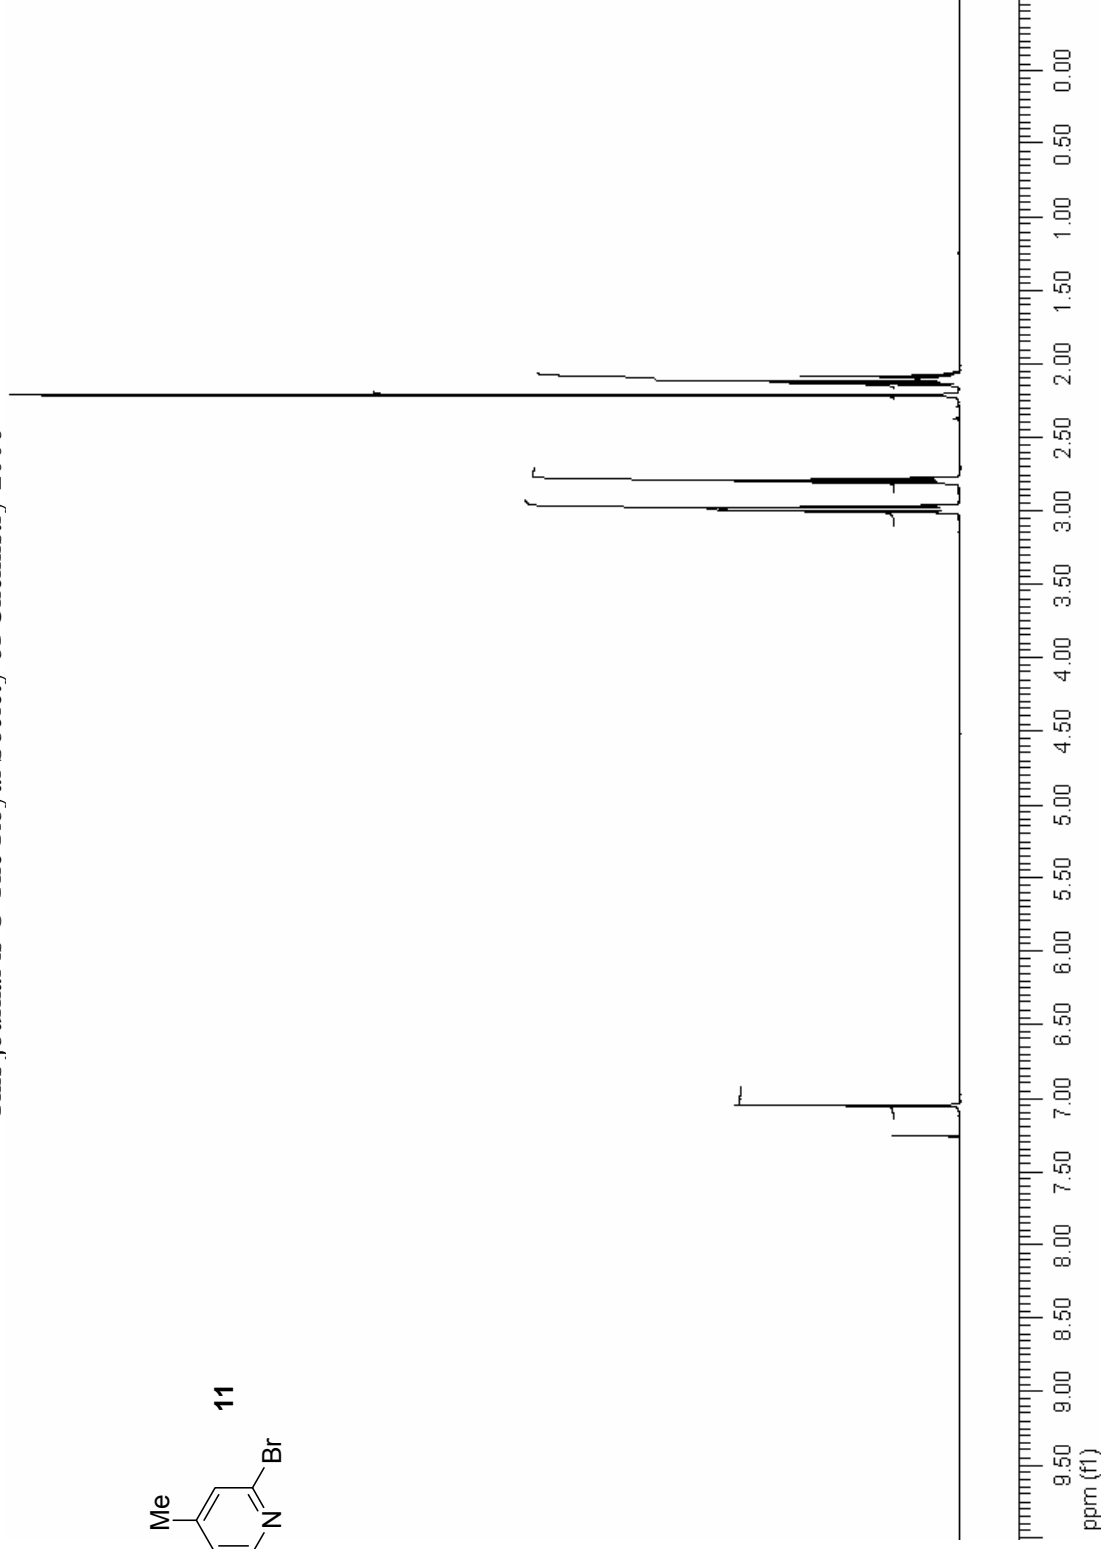

<sup>1</sup>H NMR spectrum (CDCl<sub>3</sub>) of 2-bromo-4-methyl-6,7-dihydro-5H-[1]pyrindine **11**.

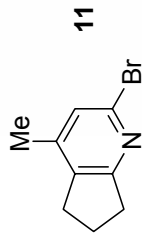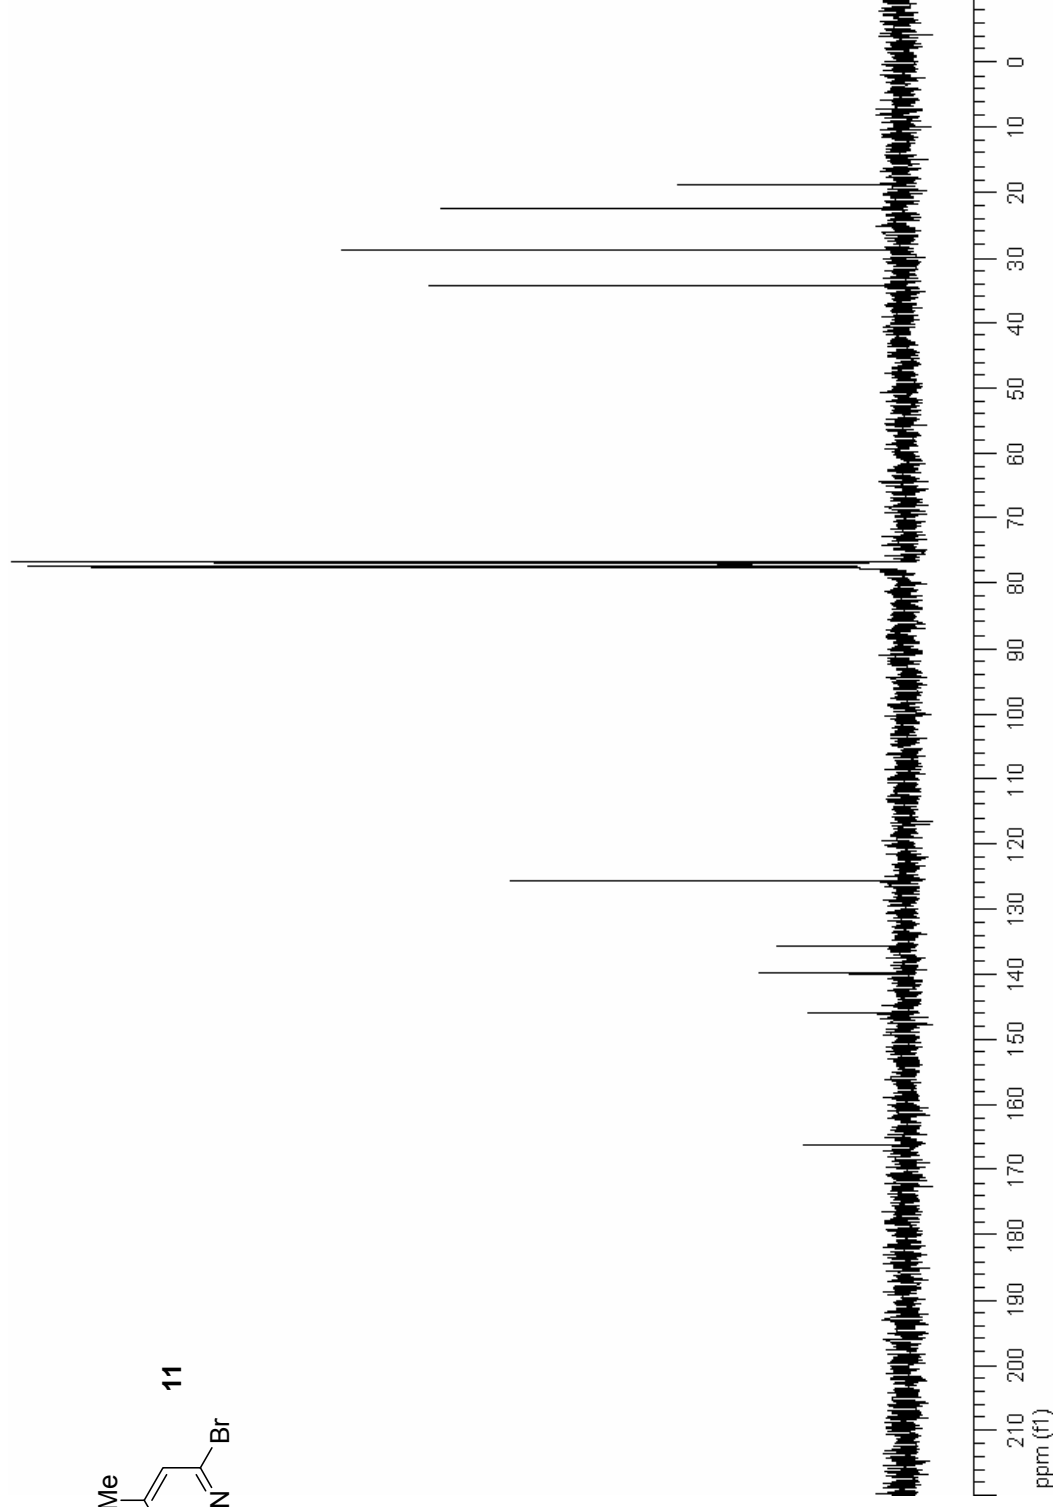

$^{13}\text{C}$  NMR spectrum ( $\text{CDCl}_3$ ) of 2-bromo-4-methyl-6,7-dihydro-5H-[1]pyrindine **11**.

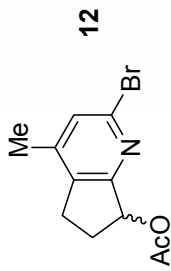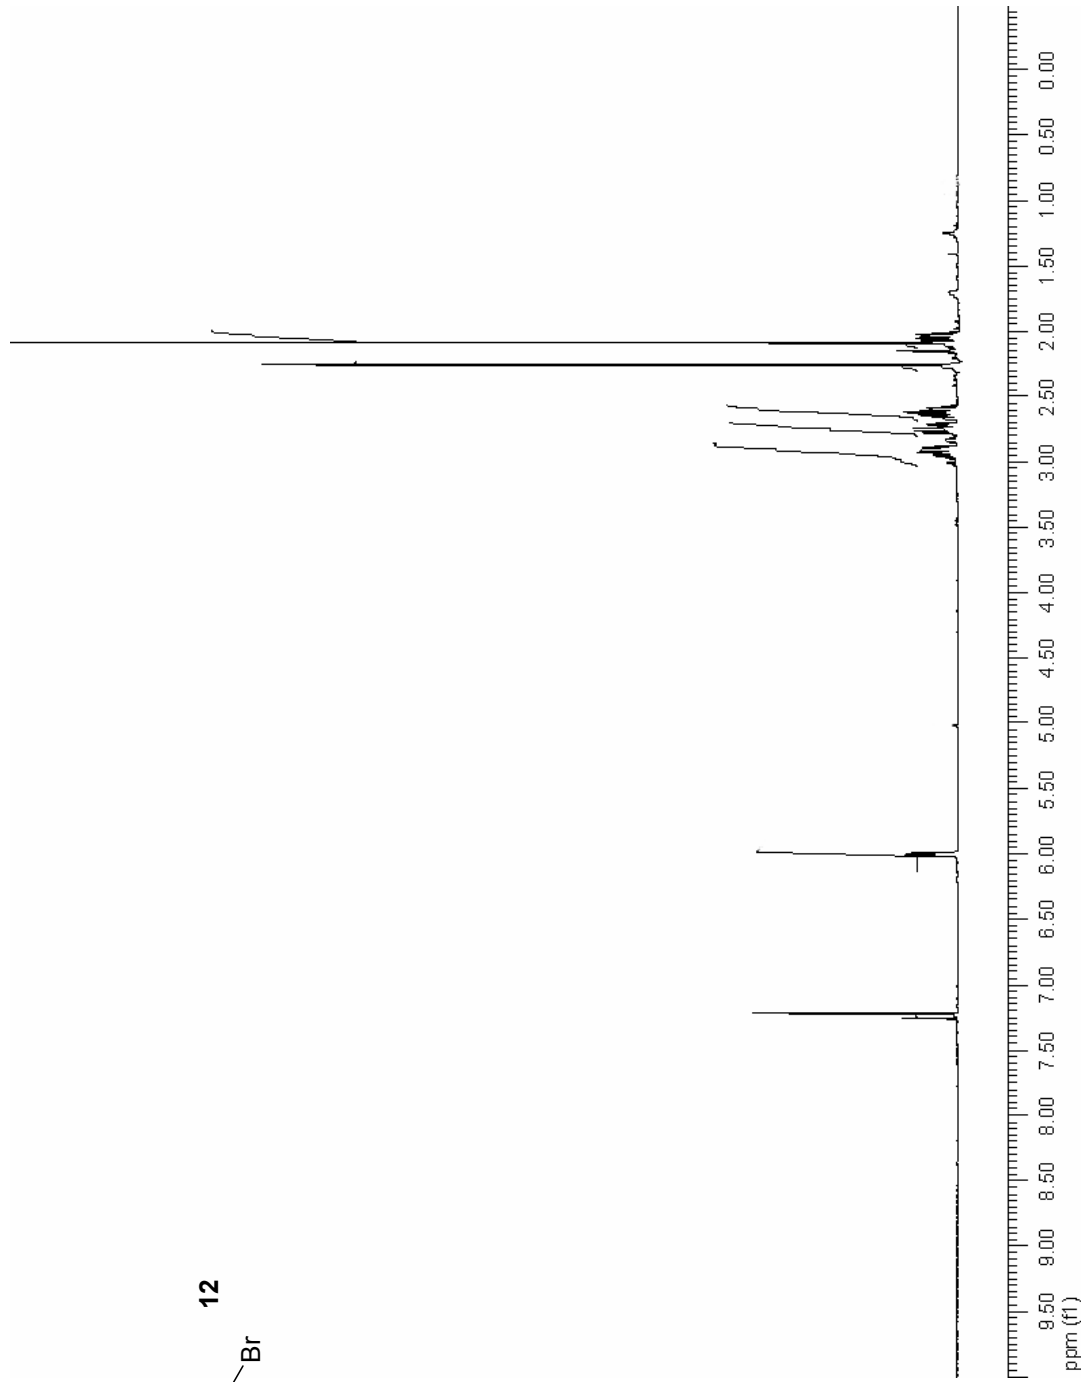

<sup>1</sup>H NMR spectrum (CDCl<sub>3</sub>) of (7*RS*)-7-acetoxy-2-bromo-4-methyl-6,7-dihydro-5*H*-[1]pyrindine **12**.

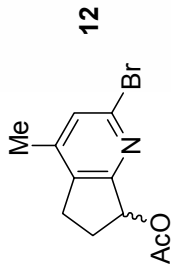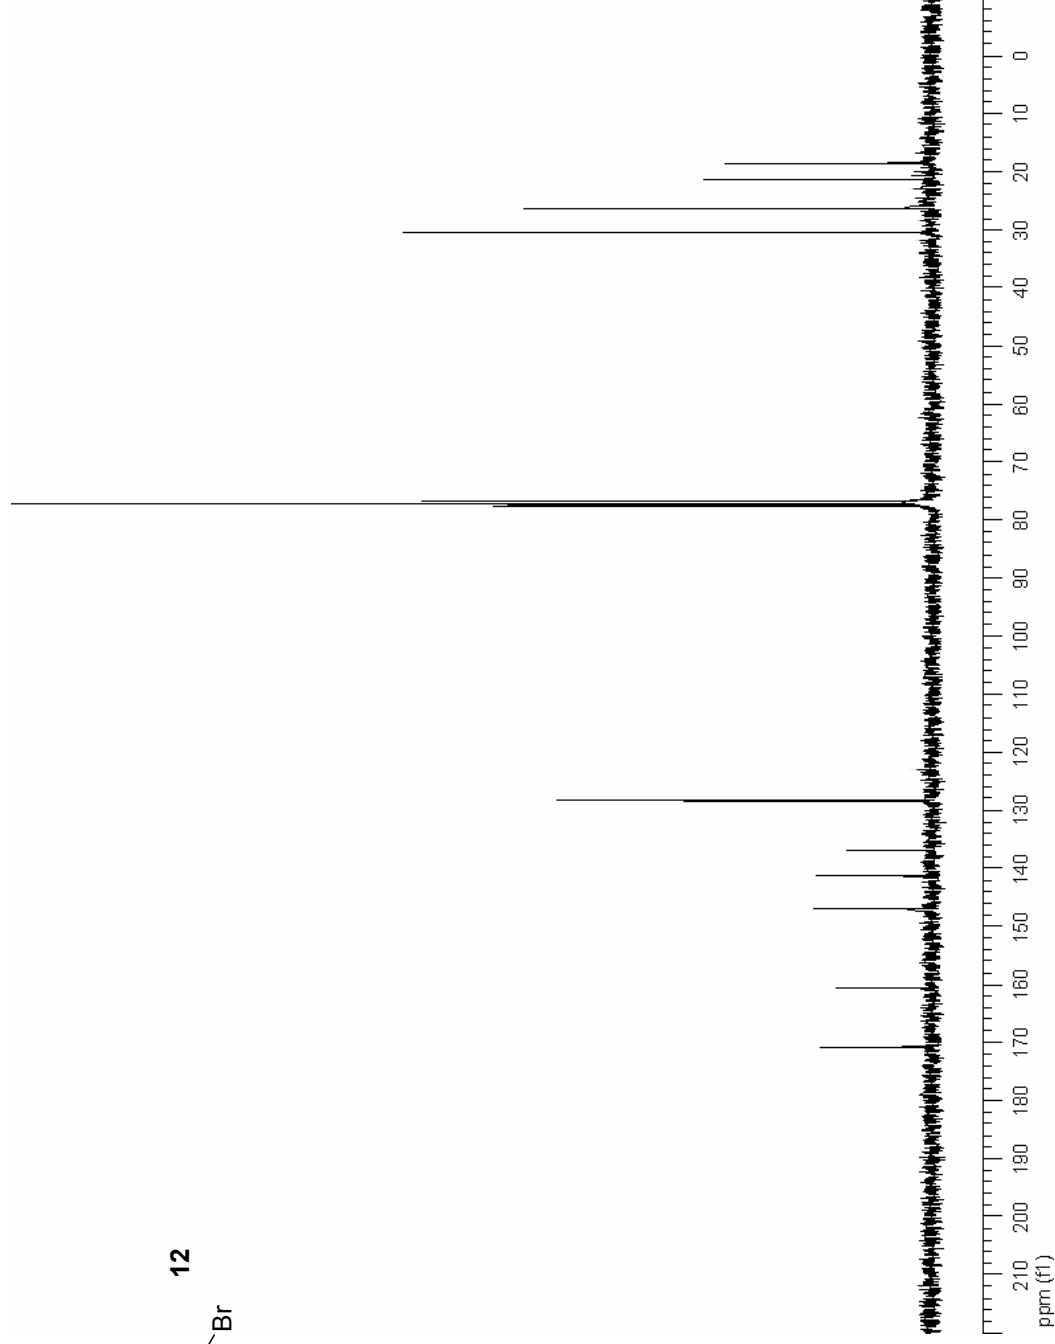

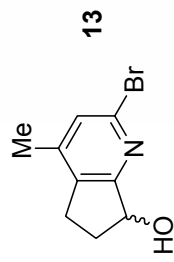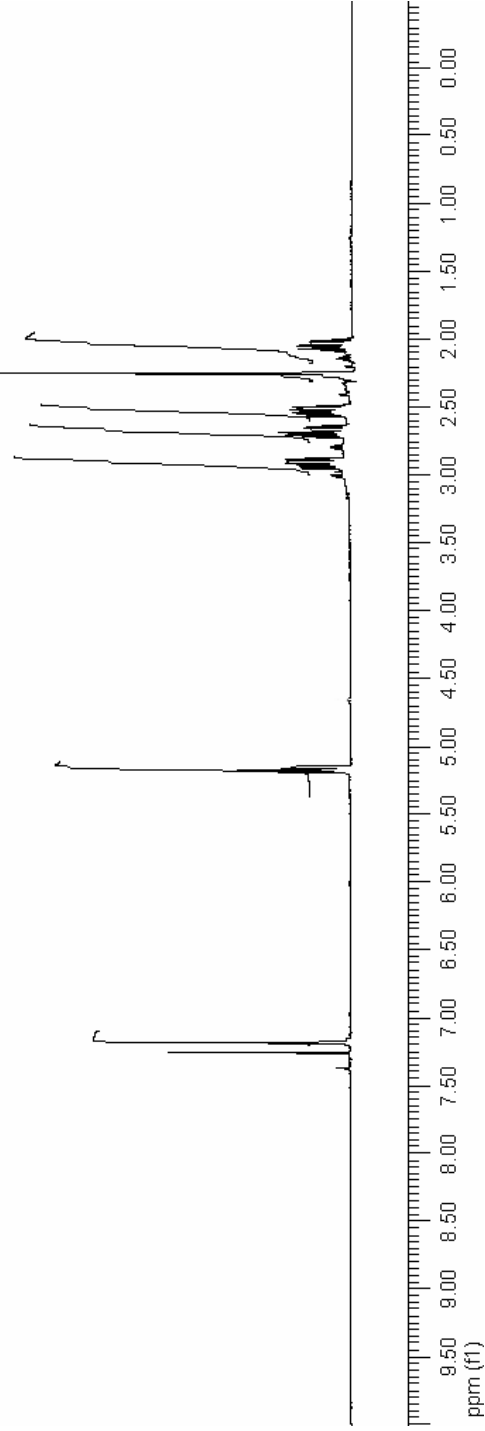

<sup>1</sup>H NMR spectrum (CDCl<sub>3</sub>) of (7*RS*)-2-bromo-4-methyl-6,7-dihydro-5*H*-[1]pyrindin-7-ol **13**.

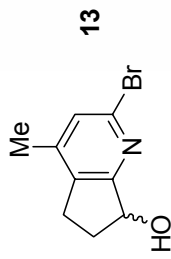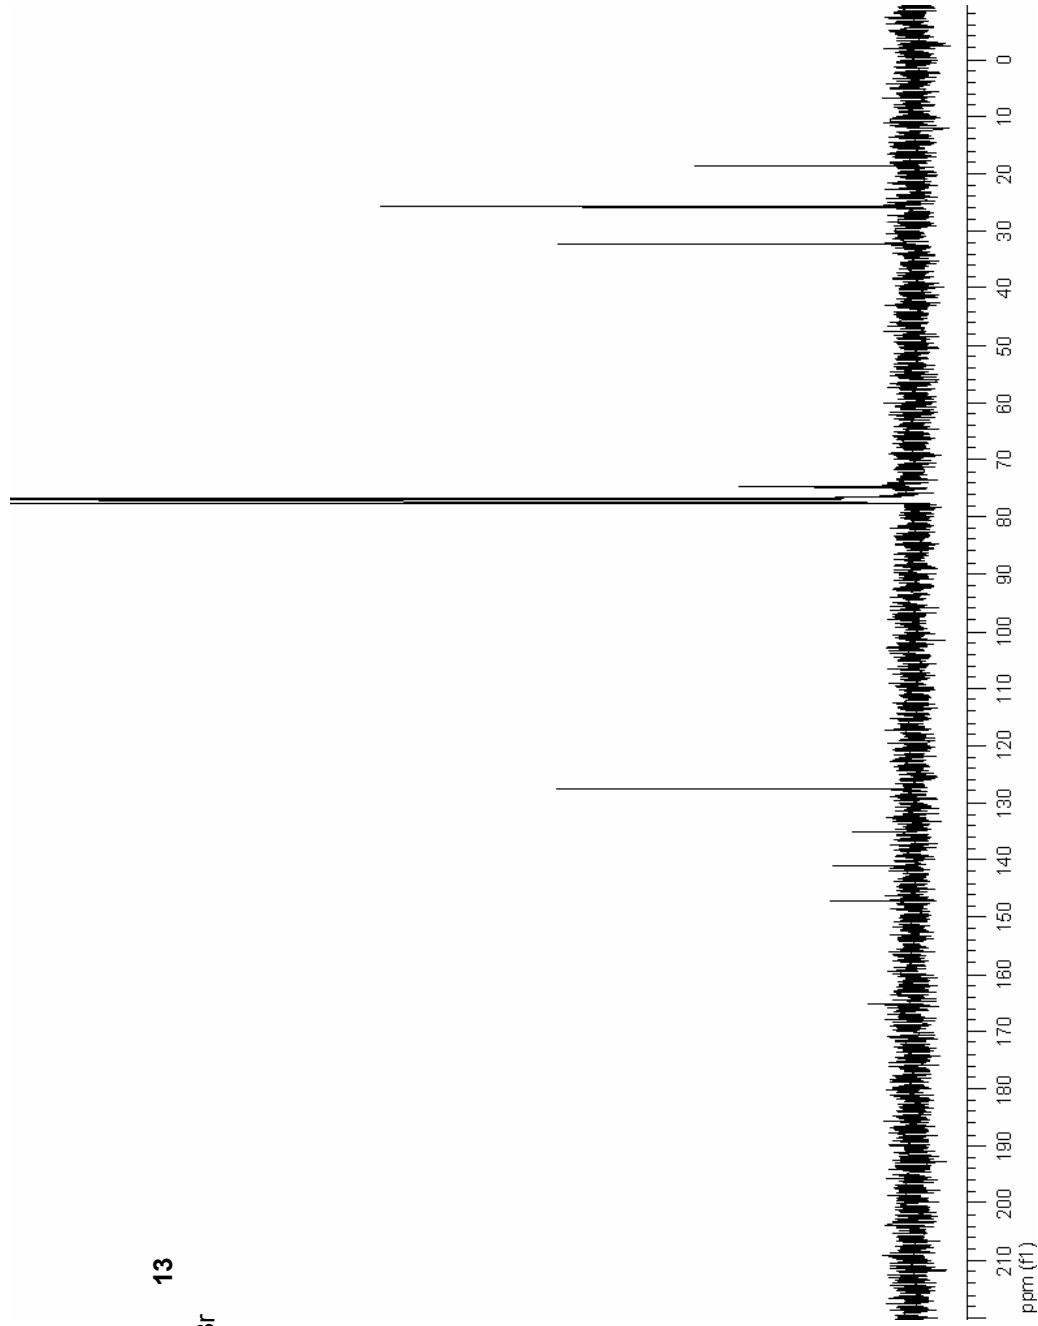

$^{13}\text{C}$  NMR spectrum ( $\text{CDCl}_3$ ) of (7*RS*)-2-bromo-4-methyl-6,7-dihydro-5*H*-[1]pyrindin-7-ol **13**.

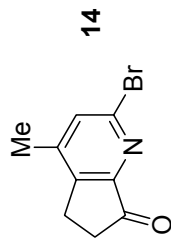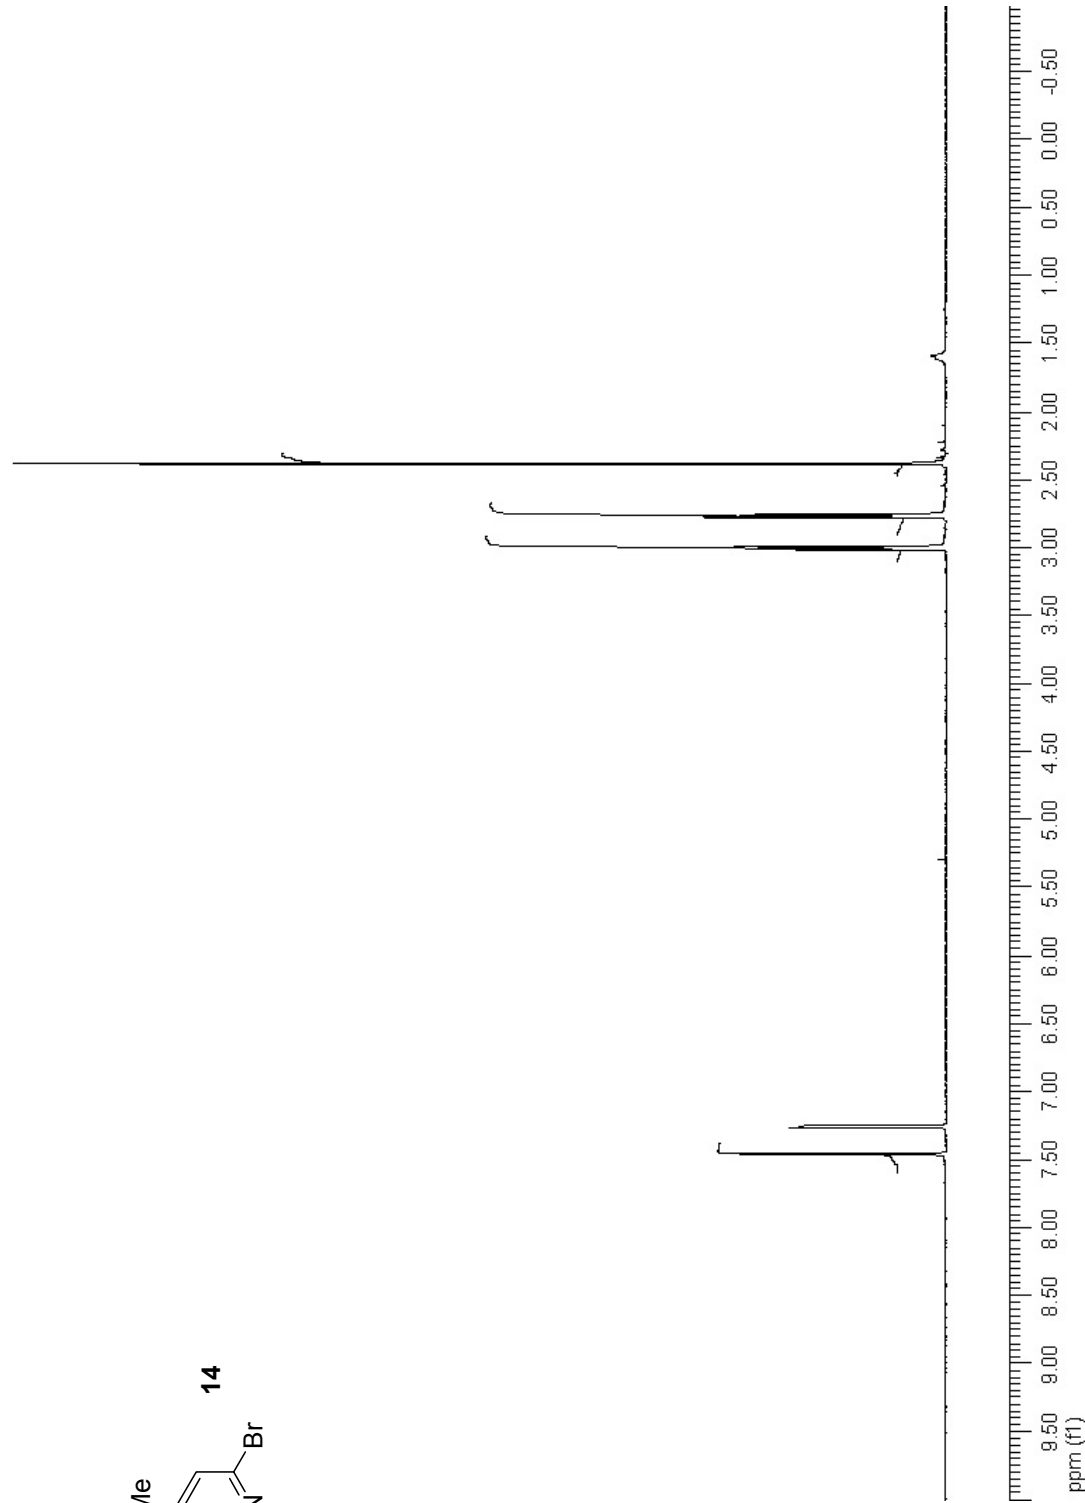

<sup>1</sup>H NMR spectrum (CDCl<sub>3</sub>) of 2-bromo-4-methyl-6,7-dihydro-5H-[1]pyrindin-7-one **14**.

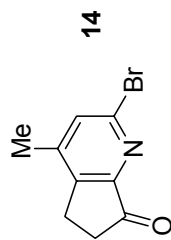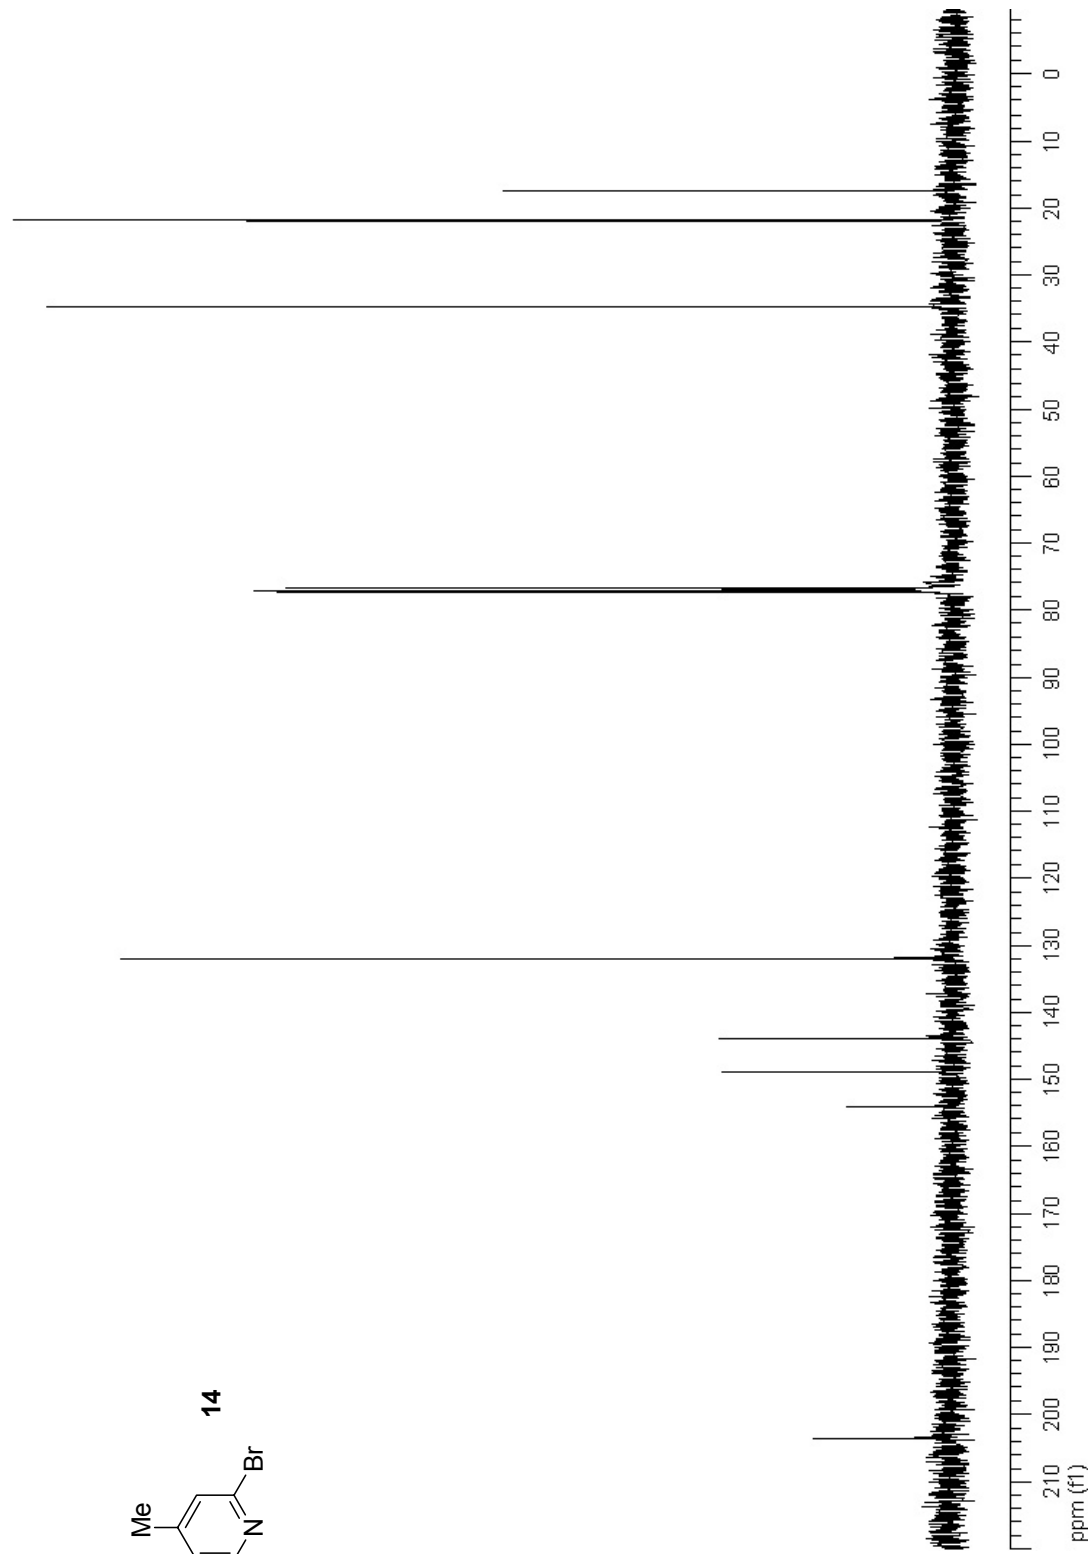

$^{13}\text{C}$  NMR spectrum ( $\text{CDCl}_3$ ) of 2-bromo-4-methyl-6,7-dihydro-5H-[1]pyrindin-7-one **14**.



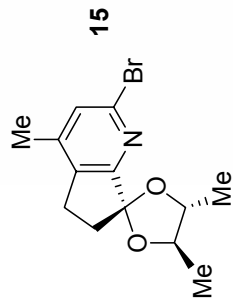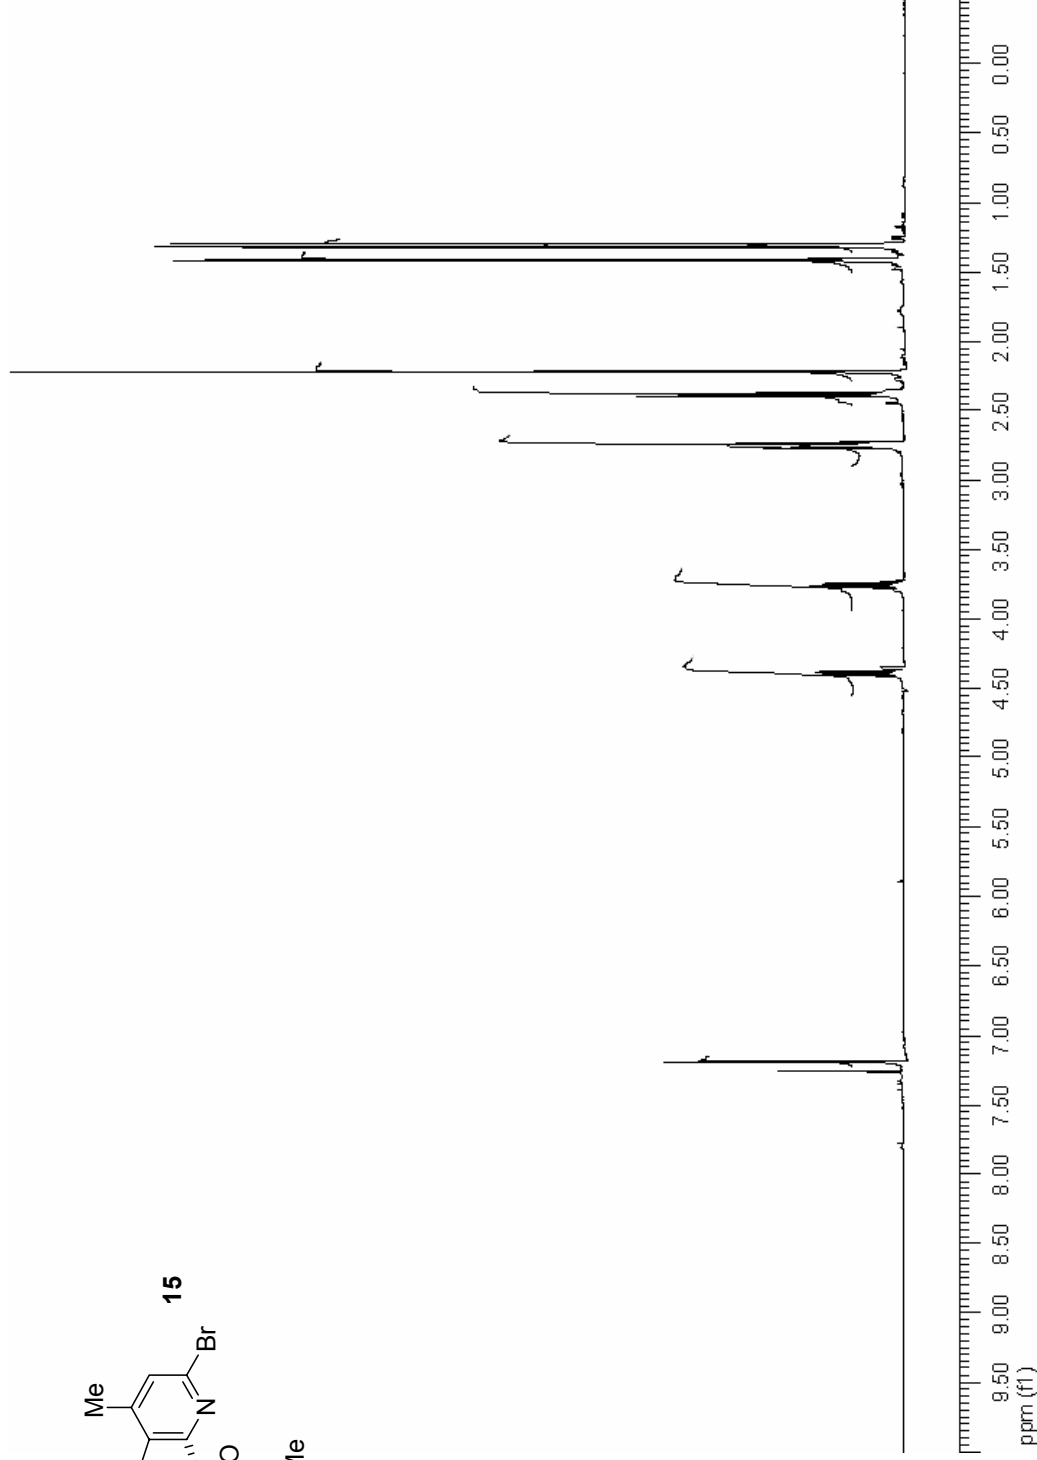

<sup>1</sup>H NMR spectrum (CDCl<sub>3</sub>) of 2-bromo-4-methyl-6,7-dihydro-5H-[1]pyrindin-7-one (2*R*,3*R*)-2,3-butanediol acetal **15**.

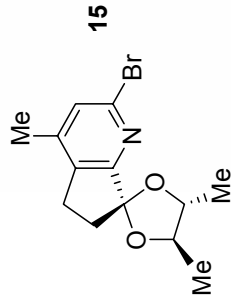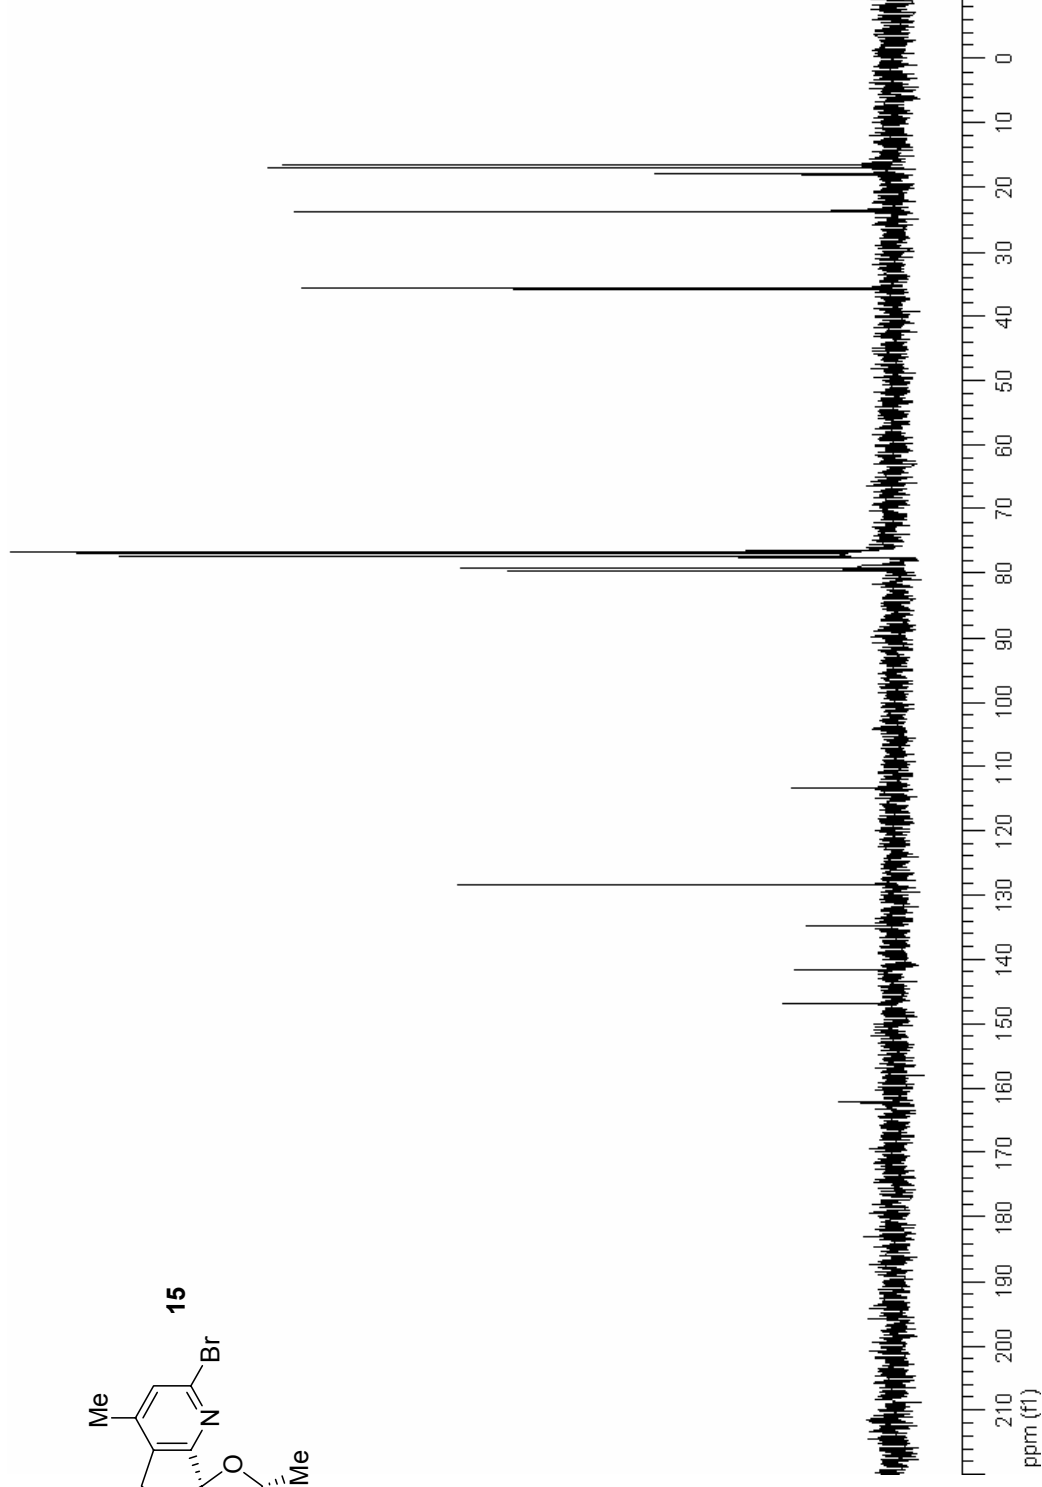

$^{13}\text{C}$  NMR spectrum (CDCl<sub>3</sub>) of 2-bromo-4-methyl-6,7-dihydro-5H-[1]pyrindin-7-one (2*R*,3*R*)-2,3,3-butenediol acetal **15**.

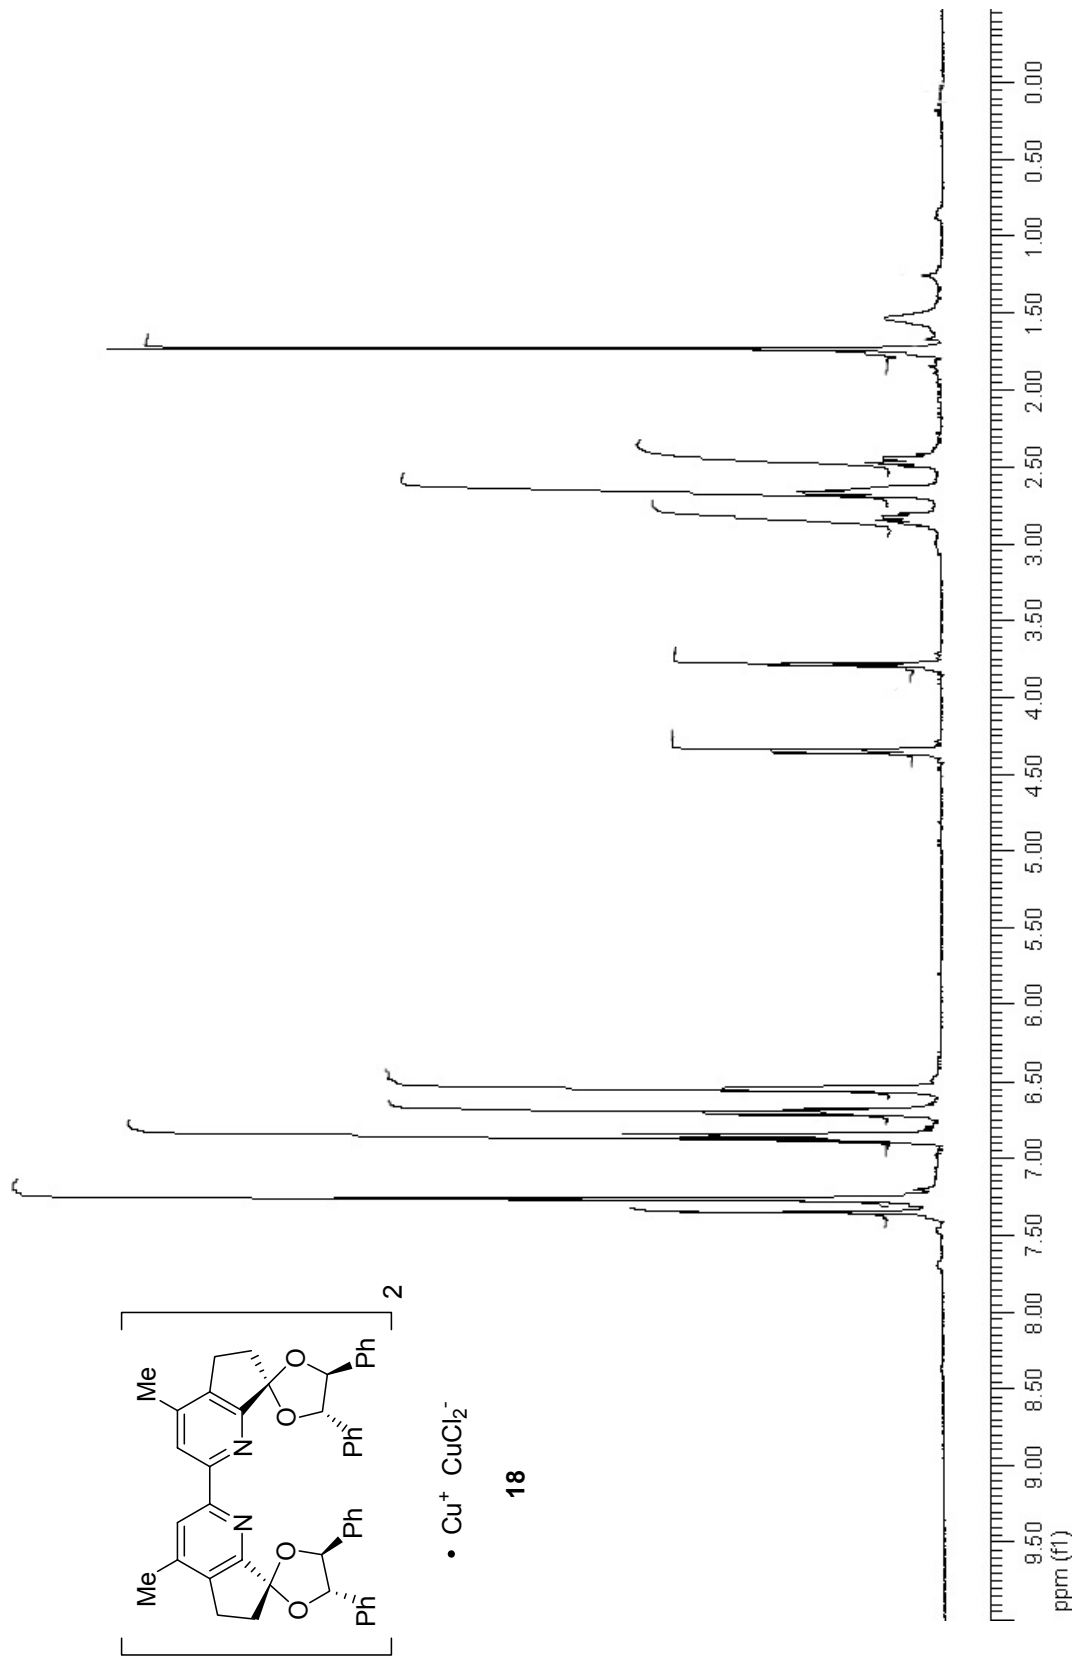

<sup>1</sup>H NMR spectrum (CDCl<sub>3</sub>) of the *bis*-2,2'-bipyridyl ligand copper(I) chloride complex **18**.

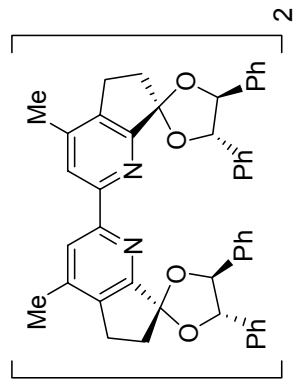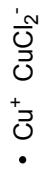

**18**

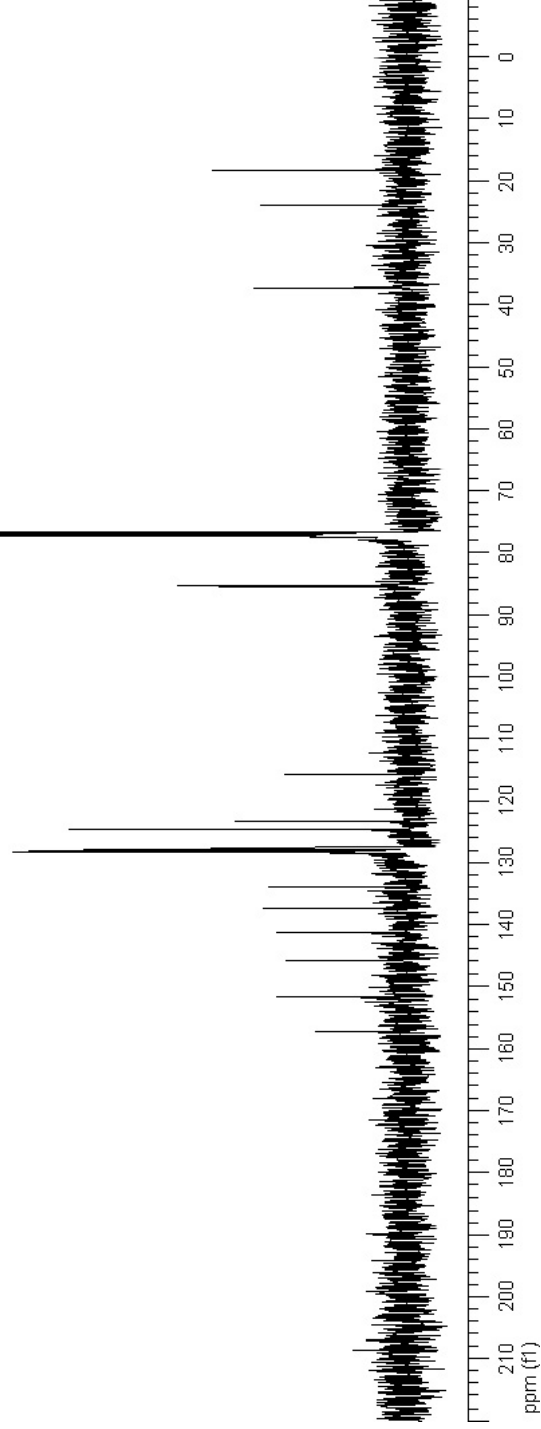

<sup>13</sup>C NMR spectrum (CDCl<sub>3</sub>) of the *bis*-2,2'-bipyridyl ligand copper(I) chloride complex **18**.
